# Supplementary material for: Combined Approach of GWAS and Phylogenetic Analyses to Identify New Candidate Genes That Participate in Arabidopsis thaliana Primary Root Development Using Cellular Measurements and Primary Root Length
Source: MDPI journal article supplement (doi:10.3390/plants11223162), 2022-11-18
Supplement: s1 [file s1]

**Table S6.** Root expression of genes found in GWAS. ND= Not determined

| Gene        |                                                                     | Root expression                                                                     | Mutant phenotype in root                                 | Reference                      |
|-------------|---------------------------------------------------------------------|-------------------------------------------------------------------------------------|----------------------------------------------------------|--------------------------------|
| AT3G04420.1 | NAC048                                                              | Cambium of vascular tissues<br>Late-stage differentiating root hair epidermal cells | Overexpression leads to vascular disorganization         | Yang et al., 2019<br>ePLANT    |
| AT3G04410.1 | NAC domain transcriptional regulator superfamily protein            | Cortex, epidermis pericycle, lateral root cap                                       | ND                                                       | ePLANT                         |
| AT3G04430.1 | NAC domain-containing protein 49                                    | ND                                                                                  | ND                                                       | ePLANT                         |
| AT3G04440.1 | Plasma-membrane choline transporter family protein                  | Endodermis in maturation zone                                                       | ND                                                       | ePLANT                         |
| AT3G04443.1 | hypothetical protein                                                | PR 1 day seedling                                                                   | ND                                                       | EFP<br>BROWSER                 |
| AT3G12120.1 | fatty acid desaturase 2                                             | Cortex, epidermis pericycle, meristem, differentiation zone                         | <i>fad2</i> loss of function has short PR length that WT | Zhang et al., 2012, ePLANT     |
| AT3G12130.1 | KH domain-containing protein/zinc finger (CCCH type) family protein | Cortex, epidermis pericycle, meristem, differentiation zone                         | ND                                                       | Yan et al., 2017, ePLANT       |
| AT3G12140.1 | Emsy N Terminus (ENT)/ plant Tudor-like domain-containing protein   | Cortex, epidermis.                                                                  | ND                                                       | ePLANT                         |
| AT3G29034.1 | Transmembrane protein                                               | PR 1-day seedling                                                                   | ND                                                       | EFP<br>BROWSER                 |
| AT3G29035.1 | NAC domain-containing protein 3                                     | Root tip, vasculature, maturation zone                                              | ND                                                       | Balazadeh et al., 2011, ePLANT |
| AT4G04990.1 | Serine/arginine repetitive matrix-like protein (DUF761)             | Vasculature, procambium, pericycle                                                  | ND                                                       | ePLANT                         |
| AT3G62570.1 | Tetratricopeptide repeat (TPR)-like superfamily protein             | PR 1-day seedling                                                                   | ND                                                       | EFP<br>BROWSER                 |

|             |                                                          |                                                                                                                                      |                                                                          |                   |
|-------------|----------------------------------------------------------|--------------------------------------------------------------------------------------------------------------------------------------|--------------------------------------------------------------------------|-------------------|
| AT3G62580.1 | Late embryogenesis abundant protein (LEA) family protein | Vasculature, Maturation zone, cortex, epidermis pericycle, meristem, Elongation zone                                                 | ND                                                                       | ePLANT            |
| AT3G62590.1 | PLIP3 alpha/beta-Hydrolases superfamily protein          | Vasculature, cortex, epidermis pericycle,                                                                                            | ND                                                                       | ePLANT            |
| AT3G62600.1 | DNAJ heat shock family protein, ERdj3B                   | Elongation zone, cortex, epidermis pericycle, Quiescent center                                                                       | ND                                                                       | ePLANT            |
| AT3G18900.1 | Ternary complex factor MIP1 leucine-zipper protein       | Meristem, pericycle                                                                                                                  | ND                                                                       | ePLANT            |
| AT3G18905.1 | F-box/associated interaction domain protein              | ND                                                                                                                                   | ND                                                                       | EFP BROWSER       |
| AT3G18910.1 | EIN2 targeting protein2                                  | Quiescent centre, Differentiating lateral root cap cells                                                                             | The overexpression led to shorter PR in the presence of ethylene         | Qiao et al., 2008 |
| AT3G18930.1 | RING/U-box superfamily protein                           | Stele                                                                                                                                | ND                                                                       | ePLANT            |
| AT3G43960.1 | Cysteine proteinases superfamily protein                 | Expression between meristem and elongation zone. Early-stage differentiating root hair epidermal cells, cortex, epidermis pericycle, | Mutant exhibits shorter root hairs under phosphate-deficient conditions. | Lin et al., 2011  |
| AT3G43970.1 | hypothetical protein                                     | Vasculature, epidermis                                                                                                               | ND                                                                       | ePLANT            |
| AT3G43980.1 | Ribosomal protein S14p/S29e family protein               | Vasculature, meristem                                                                                                                | ND                                                                       | ePLANT            |
