# Supplementary material for: Combined Approach of GWAS and Phylogenetic Analyses to Identify New Candidate Genes That Participate in Arabidopsis thaliana Primary Root Development Using Cellular Measurements and Primary Root Length
Source: MDPI journal article supplement (doi:10.3390/plants11223162), 2022-11-18
Supplement: s1 [file s1]

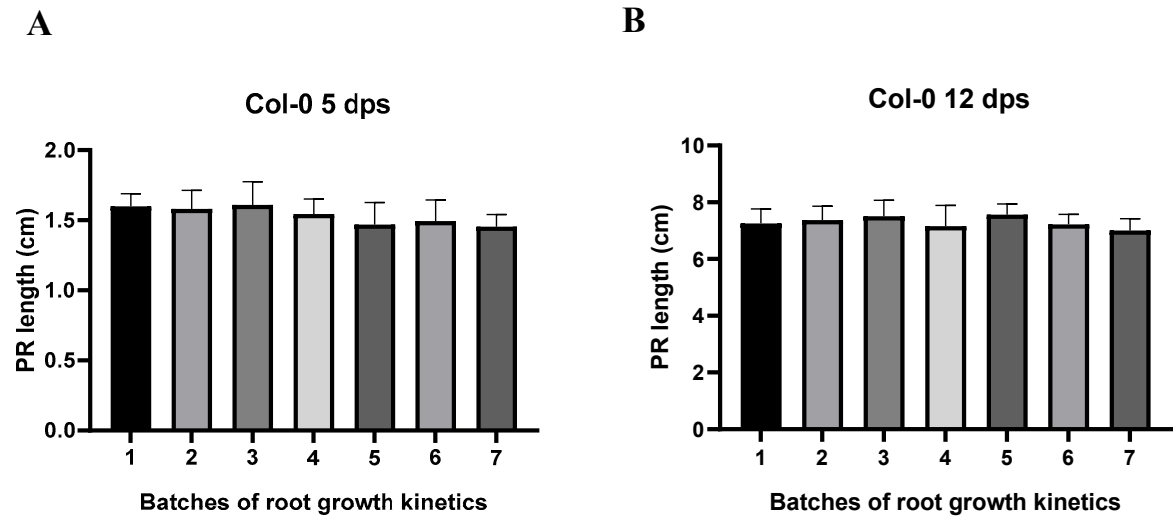

**Figure S1.** Primary root length of Col-0 at 5 (A) and 12 dps (B) used as internal control in the seven batches of the time course growth of the 124 accessions. No statistical differences (*one-way ANOVA*  $P < 0.05$ ; HSD-test,  $P < 0.05$ ) were observed between batches.

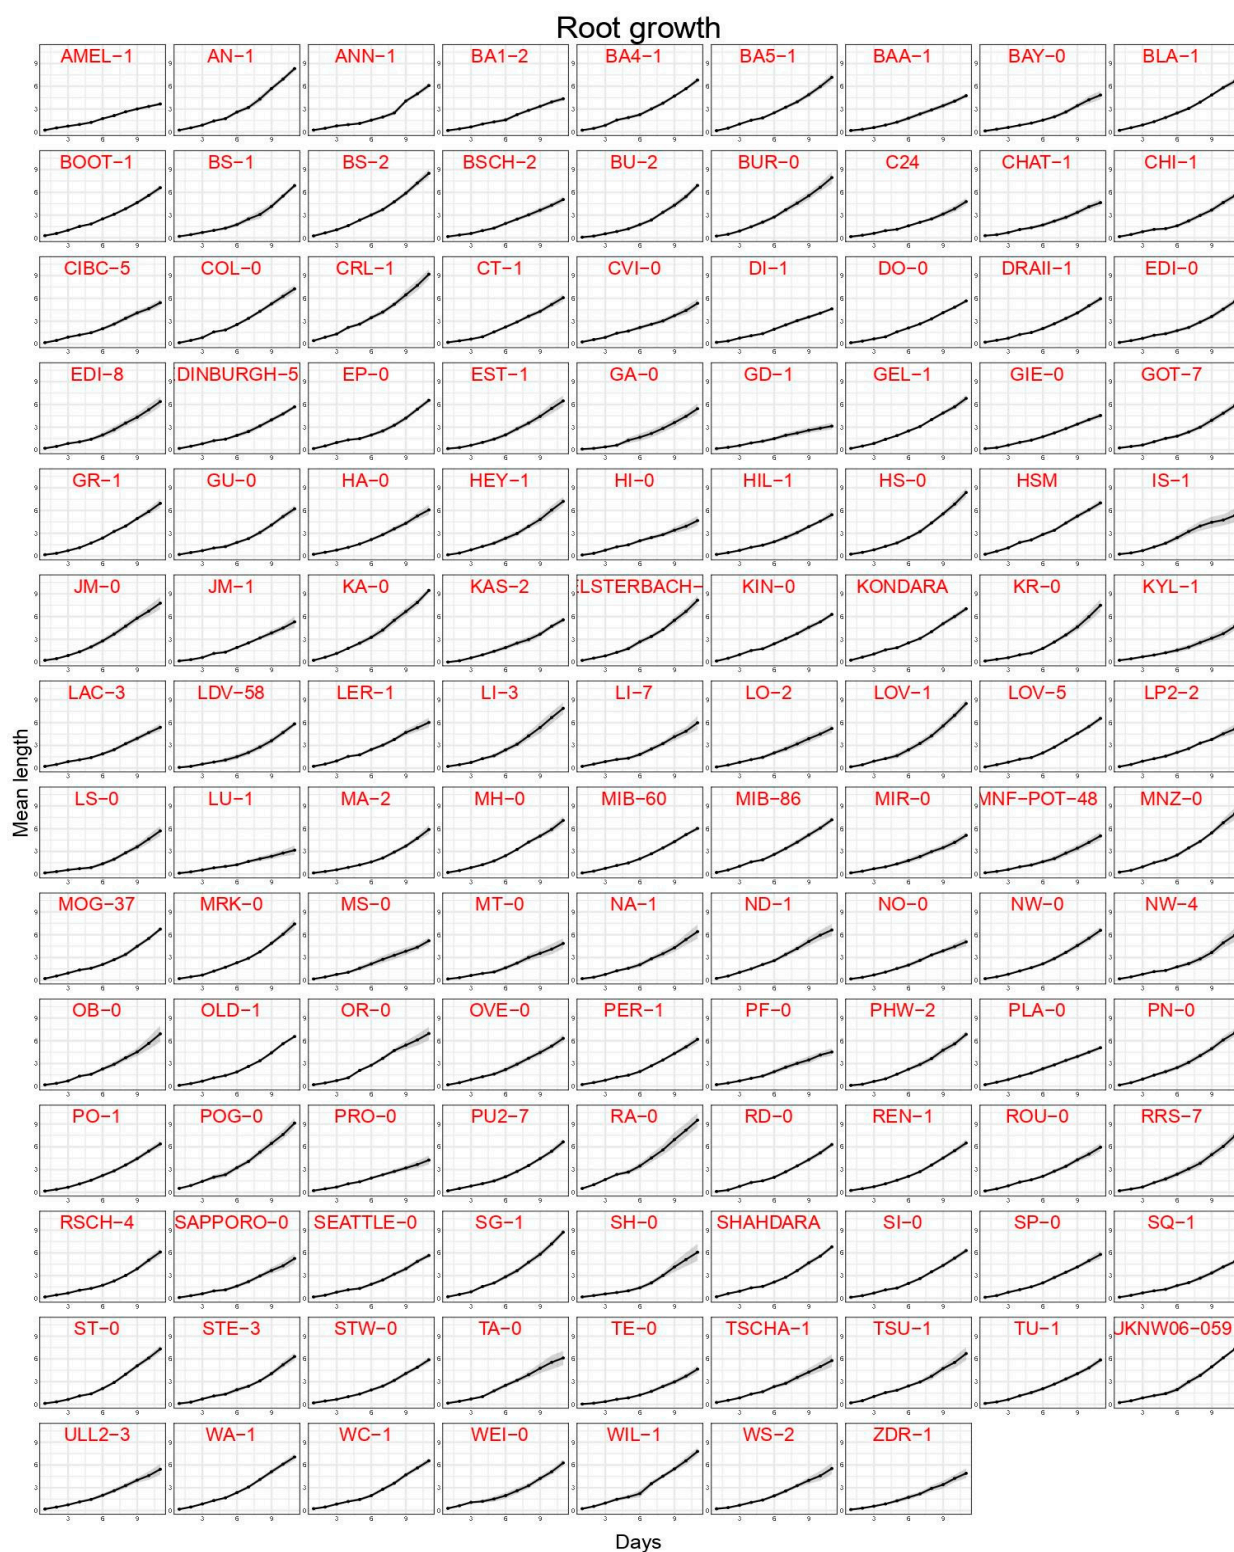

**Figure S2.** The primary root time course growth of the 124 accessions performed during 12 dps.

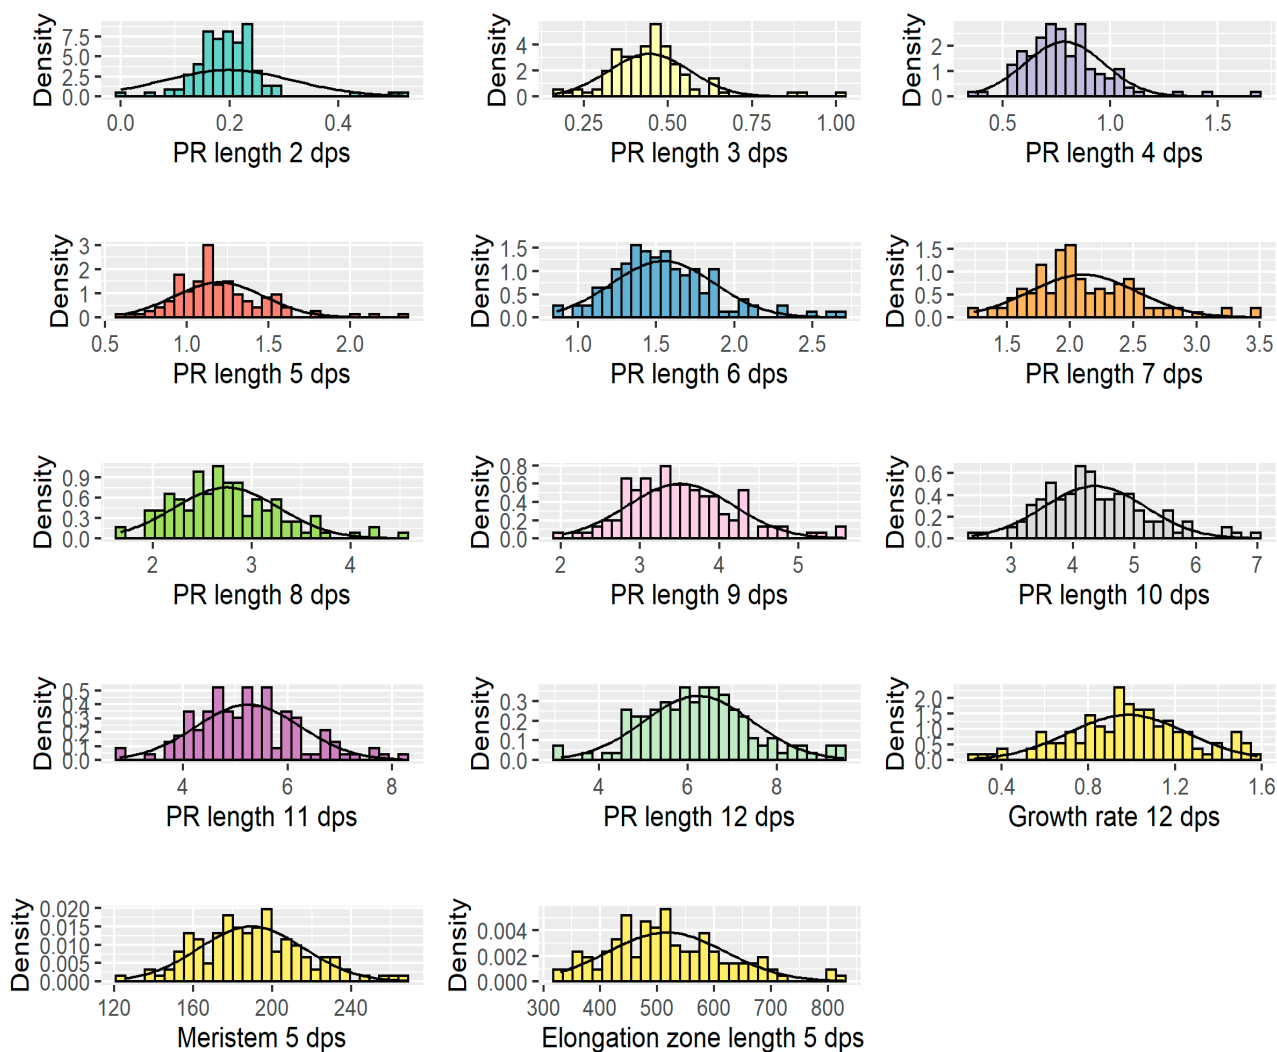

**Figure S3.** Histograms representing the density distribution of each trait analysed.

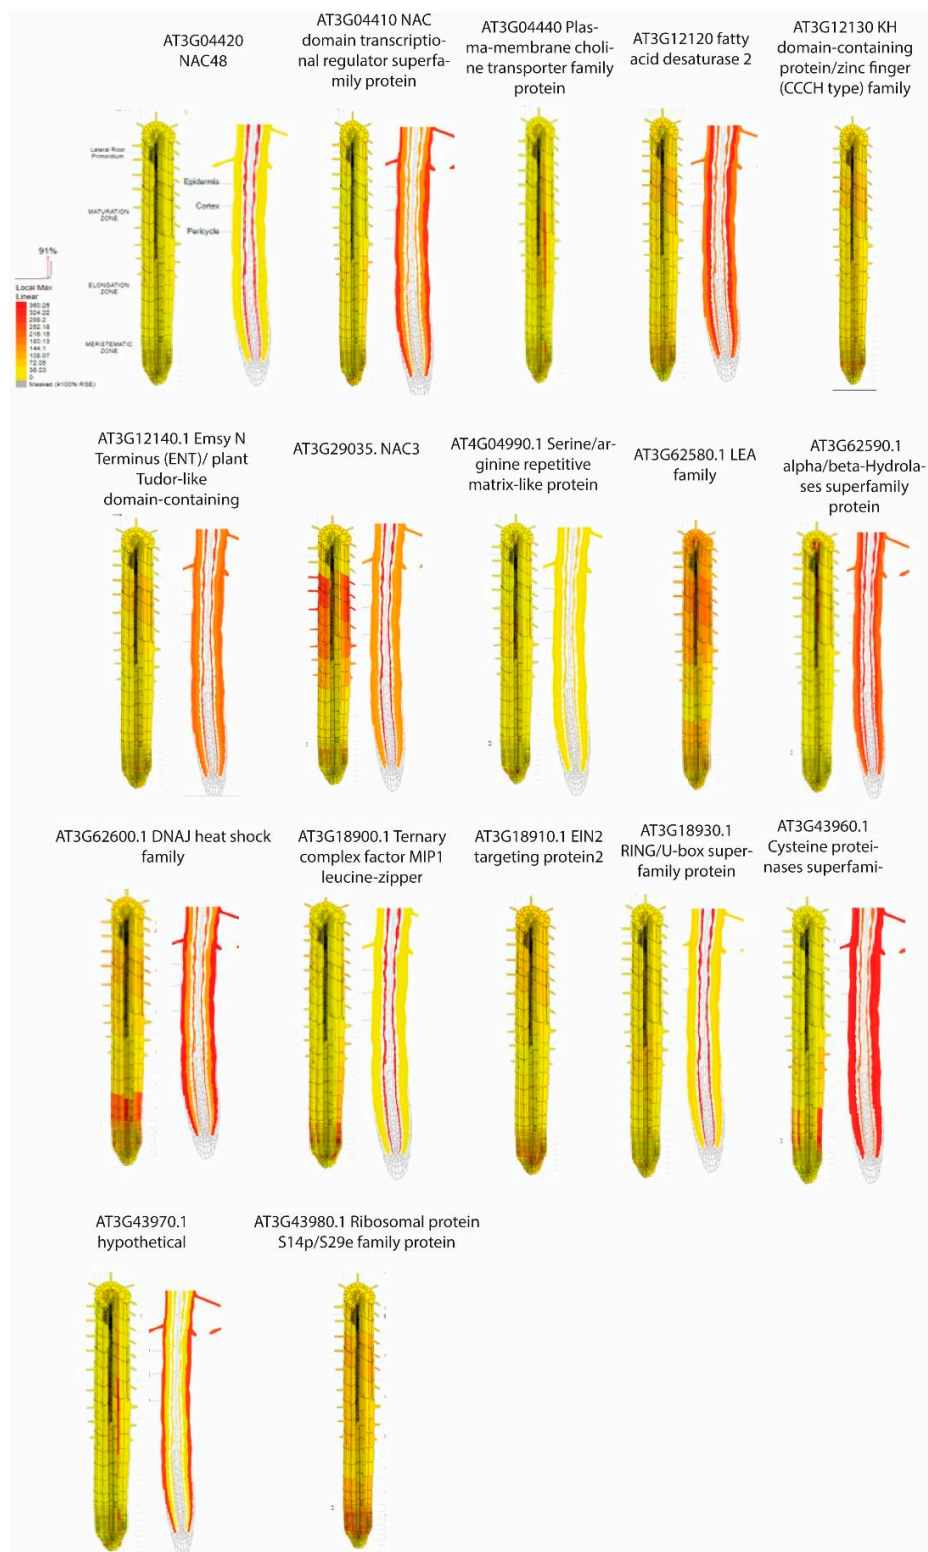

**Figure S4.** Root expression of genes found in GWAS. The images were retrieved from the Plant and Tissue and Experiment eFP Viewer (<http://bar.utoronto.ca/eplant/>)



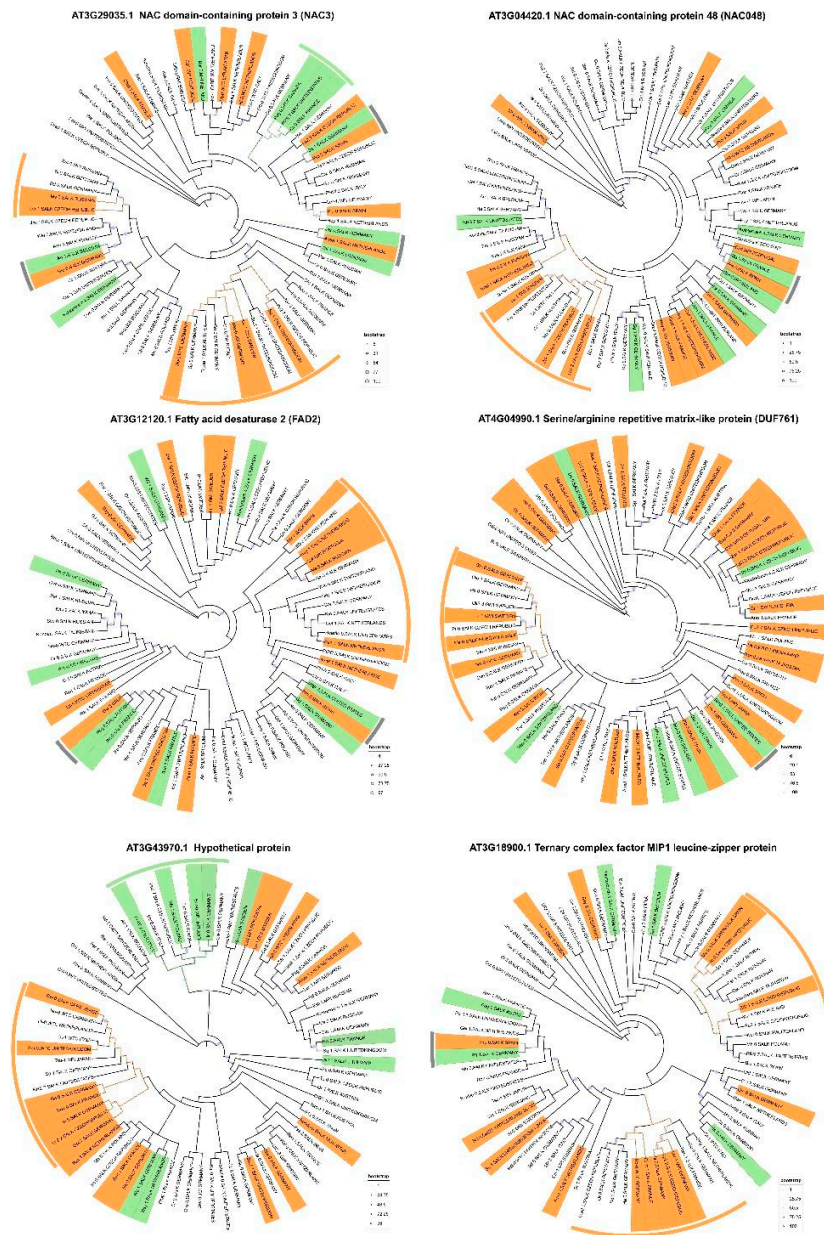

**Figure S5.** Phylogenetic trees of the genes with the highest score found in GWAS and based on the four traits analysed

AT3G29035.1 NAC domain-containing protein 3 (NAC3)

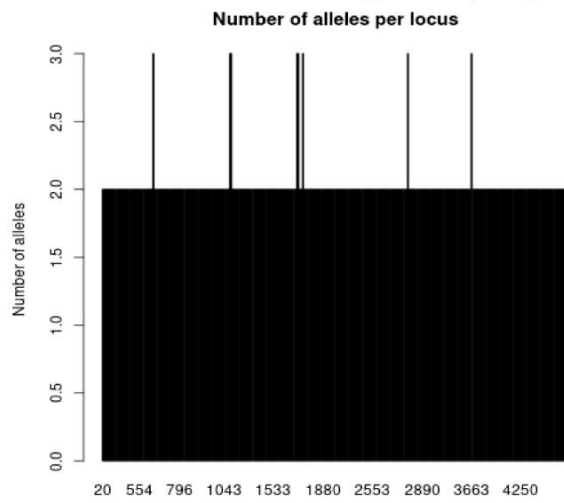

AT3G04420.1 NAC domain-containing protein 48 (NAC048)

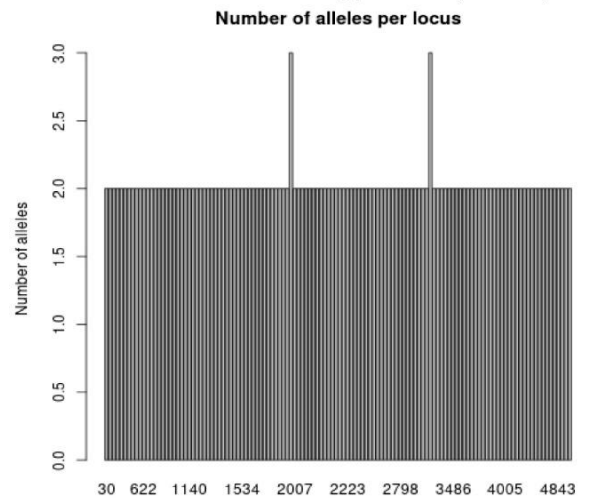

**Figure S6.** Number of alleles per locus derived from the alignment of homologs for NAC3 and NAC048 from 79 accessions. (A) NAC3 has 92 SNPs yielding 2 alleles and 3 SNPs related to 3 additional alleles in exon 3 (701 and 1470pb). (B) NAC048 has 3 SNPs with 2 alleles in exon 3 (578 and 718pb) and 2 SNPs with 2 other alleles in exon 5 (between 1080 and 1157pb). The analysis was made using a adegenet R package.
