# Supplementary material for: Combined Approach of GWAS and Phylogenetic Analyses to Identify New Candidate Genes That Participate in Arabidopsis thaliana Primary Root Development Using Cellular Measurements and Primary Root Length
Source: Plants (Basel). 2022 Nov 18;11(22):3162. doi: 10.3390/plants11223162 (PMC9697774; doi:10.3390/plants11223162)
Supplement: Supplementary file 1 [file plants-11-03162-s001.zip]

Archive with 8 entries (8 files):
- Data S1_SUPP BLAST NAc3 and NAC048.txt
- Figure supplementary S1-S6.pdf
- Table S1. List of accessions.xlsx
- Table S2. Summary_data.xlsx
- Table S3. Classification of traits in short, medium and large..xlsx
- Table S4. Root expression.pdf
- Table S5_SNPs_NAC3.csv
- Table S6_SNPs_NAC48.csv
