# Supplementary material for: Combined Approach of GWAS and Phylogenetic Analyses to Identify New Candidate Genes That Participate in Arabidopsis thaliana Primary Root Development Using Cellular Measurements and Primary Root Length
Source: Plants (Basel). 2022 Nov 18;11(22):3162. doi: 10.3390/plants11223162 (PMC9697774; doi:10.3390/plants11223162)
Supplement: Supplementary file 1 [file plants-11-03162-s001.zip › Data S1_SUPP BLAST NAc3 and NAC048.txt]

SUPPLEMENTARY 
(A)NAC3 FASTA sequences of COL-0,n and Exon 3, (B)Standard Nucleotide BLAST - NCBI of NAC3 from TAIR and 1001 genomes project, (C)Standard Nucleotide BLAST - NCBI of NAC3 from 1001 genomes project and exon 3,(E)NAC048 FASTA sequences of COL-0, a exon 3 and Exon 5 (F)Standard Nucleotide BLAST - NCBI of NAC048 from TAIR and 1001 genomes project (G)Standard Nucleotide BLAST - NCBI of NAC048 from 1001 genomes project and exon 3 (H) Standard Nucleotide BLAST - NCBI of NAC048 from 1001 genomes project and exon 5

(A) FASTA sequences of COL-0,n and Exon
##############################################################################################
>AT3G29035.1.NAC03_1001genome
ATGGATTACAAGGTATCAAGAAGTGGGGAGATAGTAGAAGGAGAAGTAGAAGATTCAGAAAAGATTGATTTACCACCTGGTTTCAGATTTCACCCAACTGATGAAGAACTTATAACACACTATCTAAGACCAAAGGTTGTAAACTCTTTTTTCTCTGCTATAGCTATTGGTGAAGTTGATCTCAACAAAGTCGAGCCTTGGGACTTGCCTTGTAAGTTATAGGTCATTTATTTTCTAGGTTTTTAAAAACCTTCTATGTTTTGTTACTTCTAAACACTGTTTTTTTTTAGGGAAGGCTAAGCTTGGGGAAAAAGAGTGGTACTTCTTTTGCGTAAGAGACCGAAAATACCCGACTGGTTTAAGAACGAATCGTGCTACTAAAGCCGGTTATTGGAAAGCTACAGGGAAAGATAAAGAGATCTTCAAAGGGAAATCTCTTGTTGGTATGAAGAAAACATTGGTTTTCTACAAAGGAAGAGCTCCTAAAGGAGTAAAAACAAATTGGGTCATGCATGAGTATCGATTAGAAGGCAAATTCGCTATCGATAATCTCTCTAAAACCGCTAAGGTAACATTAATATATTAATATATATCATAGTTCTTCTCTGTTTTTGTTGTGACATGATGTTTTTTTTATGCAAAGCCAAAGGTAATATGTATATTGATTTATAATGTTTTCTTGTGTTGTTTGTGGATGCAGAACGAATGTGTTATTAGTCGTGTTTTTCATACACGGACTGATGGTACGAAGGAGCATATGTCCGTTGGTTTACCTCCGCTGATGGATTCTTCTCCATATCTAAAGAGTAGAGGACAAGACTCTTTAGCCGGGACCACCCTTGGTGGGTTGTTGTCTCACGTTACCTACTTCTCCGACCAAACAACCGATGACAAGAGTCTTGTGGCCGATTTTAAAACTACCATGTTTGGTTCCGGATCGACTAACTTTTTACCAAACATAGGTTCTCTACTAGACTTCGATCCTCTGTTTCTACAAAACAATTCTTCAGTACTGAAGATGTTGCTTGACAATGAAGAAACCCAATTTAAGAAGAATCTTCACAATTCAGGTTCATCAGAGAGTGAACTAACAGCGAGTTCTTGGCAAGGTCACAATTCTTATGGTTCCACTGGTCCAGTGAATCTTGATTGCGTTTGGAAATTCTGAATTTGGAAAATCGAAAATTTGGATGTTAACTAGGGGGTATATAGGGTTTTTAAAAACAGTGTATATATGCGTTATGTGTTAGCTTTAGATTCTAGGATATACAAAGATGACACTAATAGATTCTTATAACATTTTGTAAAAAAAAATCATTGTAGTGAATACTCTCTTGCCATTTGAAATCCATTGTGTTTGCATATTTAAGGTGTTCATAAATTGTCATGCTGAATTGTGTTTGCATATTCTCATTATTTCCCTGTTTGTAATTAATGATTGTAACATACCTAAGTAGATAATATTAGATTAAAAATATGACTAGTTTACCAAATTTTACTTGTTACATTTTGGGTTCTTAATCAAAATCAAAAGGCTGCAAATGGTTGTCTCAAGTAGAAAATATTAAGTTGAAAAAAACTGAGATCTTAATAAAACTTCTGATAAACAGAATAAAAACTAAACAAGTGAAACAATAAGGCTTCATGATGAAAAGTGAATTTCAGGAGATTACTGGCAGCAGAGACACGAAAAAAAAACCGAAACTGATTCGGGTCGGGTCATAAGCTGCAAAGCGGATCCCTAATTTTGATATATGCACATAAAATTATTAGACAGATTCCCCAATTGTTTTTACAGGGATGTCCCAGTACTTGTGCAATCATAAACAGCCTTTGATACTCACAAAAAAAAAAAACGAAAATAACGAAGAAGATAGAAACGGCGGAAGAACATAAGTGTGTATTGTCTTTTAGAAACTATCGGTGTGATAAACAAGCTTATATATAAACTAGTAAAACCCTAATCATGTGTTTGTTGATATTTTGGGCTTTTTTGACCTAAATATTAATGGGCTTTTATTATATGTCAAAATGGGCTTTGTTTTTTCATTCACAATCCCGAGAAGAACTTACTCATTTCATAAGCAAATCAATCATTCACATTTTCGAATATATAATTTAGTCATCTTTGTATATCCTAGTCATTTTTGATTTGCTATACAATTATAATTCCAAGTCTATCTCTTTATGATAATTGCCAAAAGACATTTCTAAGGGAAGACACGGATAAATACCATTTCTCGAATTGTAATCTCAATAACTCTCAATAATAGAGGGTCAAAACCTCTTTTTCTTATGCCAATTGCCTTCAAGCTTTCAATATAAAAAATTGTATTCATATATATATATATATATATATATATATATATATATATATATATATATATATATTTAATAGGAGCAATTAATCTCAACTCCAAAGTCTCCTACTCTACAGAAATTATTACTAGTTTGAGTAGTTTATATGTAATGGTATCAACCCACTCTTATCAACAAAGCATATTTCCCAAGTCAATTTTGAGATTTAAATAAGTTTTTATTTCCGGTGAAAATTATTATTAATCTGTGGATTTCCAACTTGAAATCAAATTGAGTGGAGAGACTCATATCTTATATATACTATTTAAGATTCTACTCAATTTTCAATGTGGGACAATATCTCTAATACGTCTCTTCGAGATAATGGTTCTTCTGGCCATTCATCTCGATATGTTCAGACATTGATCAGCGGGTCAACTACTGATTGAGCTGATGTGGATTGGGTTGAGCATGTGCAGATCGTGGTATGATATTTTATTAGATTGTAGGCTTCCAACTCAAAACTAATTGGCAATAAATAGAGAAATCCATCTCTTATATATACTTTTTAAAATTGTACTCAACTTCCAGTGCAAATCGTACTCAACTTCCATGCAAAGCCGTGCCGGCCACTAACCATAAACCATTTTTTTAGGCCACAATTCCAAGAAAATTGTGTTACTTTGGTTGGTTTGAGCTGACTCAAATATTCTTTATGCTTCAAATTCAATCTATTTTAGTGACATTTATTCCAATATATAATTTGAACATTTGGTTTTGTATTGTTTTTGTTATGCTTTATTTTTATATTTTAAAATTTCTTCTTATATATGTATATATAATTTAGTTTTCTTTAATTTATTATTTAATTATTTAACTAGACAAATTGGAACATATTTTTTTTTGCCCGAAATCTCAGCAGGGCACTGTTCCAATGTGAGACAATATCTTCAATCTACCTATTTTGAGGAAAAAAGAATTCTTGTTATTACATAATATACTAAGACTACCTTCATTTCAGGTTGACACCGTTCGTGTCGTGTGACCATTTTATCGGCCCTCTCTTCTCGGCGCAAATACCAAGTCTCAACGTCCAACTTCTCTCTTCTCTCTCACAGACAGACTAATATAGAATATGTGTTATATATAGTAATGAAATGATCAATCGAATTTGTATACTAATAGTTATCAAATTATTAAAAAAGTATCAGCTCCACTTAAGATCCAAATCCCTCATCATCAACTCTCCTATATAAACATTCGAACTCCTGACAATTCATCTCATAAAAAGGTTATAAAAAAAAAAGGAAAGAAAACCCAAACAATGTCTTCAAATATATTGGCCATGGTGGCCATGCAACTCCTCCTTATACGCATAGTTTCTTCCCAAAACGTTACGAATGAGTATTTGAACCACCAATGCAACAACACACAAGGGACATACACGCGGGGTAGTACGTTTGAGAAGAATCTCAACCAAGTCATCCGTAACATCTCTCACCTCCATCTTCGCTACGGTTACACCTACAACTCCAATGTTGAGGCTTACGAAGTTAGTAAAGATCCCAACATTGTCTTCGTTTTGCTCCAGTGTCGTGGTGACTCTTACGGGTCCAAGTGCCACTCCTGCCTCCACACAGCCTTCTCTGGGGTAACTTCACTTCAATATAAGTCACATATTTCCATATATGAACATATACACACGTCTAATCATAGTTAAGTTTGAGAGATAACTATATTAATTTGATTTCATTGATACAACTGATATACATCTTAACGCAAGTAGAAAAGAAAGCTATATGTTATATGTAGATTATTCCATGCATGATCGGTGTGTATATAATTGTATATATATATGACTAGCTTCGTGAGAGATGTCGGGGAAACAAAGGAGCAATAATATGGTACGACCAATGTGTTTTGGAGATTTCTTCCGTGAATACCAAGGGGAGGATTCGTTACGATAGTTTTTTCAATATGACCAACGTGAAGAATGTGAGCAGCAATGCGGAGCAGTTTAAAAATAAAAGGAAGGATCTCTTCCACAAGCTATTGTTGGGAGCCACCAAGGATGTAAGCGACAGCAATGATGCGTACGCAGTGGGGGAGACGAGGATAGGAAGAAATAAGATGTATGCAATGATGCAGTGTGCACTAGACTTAACGACGAATGGATGCTATGTGTGTCTAGAATGGATTATAGGCAGGTATGATAGCTTCTACTTTGACCGTAGACAAGGAACGAGAGTTTTGAGTAGGAGTTGTAGCTTAAGATATGAGCTTTACCCTTTTCTTAGGAGGTAAAAGACTTTTAGATGCATGAGAGCTCCATTTCTCTCTACCGGACCTCTCAAGTTTACTTGTTTGATTTTCTCTTTTCTTAAAGAGATAGAAAACACTCAGCAAAAATAGTATGGTATGGAGACTTCTTCAAACAATTATTTACGTCGTATATGTTTTATGTTGTTTTATATATATATATATATATATATAGCTTTTATGTAATTGTCAATTTCATCATGATCCTGTTCAATGATCAATTATAGATGATAGTGGATAGAAAAATAACATTGTTGAAATGAGGCTGAGTTGTTAATTTTTTTTTTTTTTGGATGATGTAATTTTGTGGGAGGATCAGAAGAATAGCCATAATATTGTTGAGCTGTTAATTCTAAGTGAAATAACCATTTATGAATATCTTA

>AT3G29035.1.NAC3_TAIR
aaactagtataagagcttggttgctcaaaccattttctcttctctctgaaaagaaactcaactttttttctttatctttaacatcaaaaaactttttcgatatctttacaaccattaaacaaaaaatttggccactacaagttgaaaaagttttgattatatctaatcgctgaaatggattacaaggtatcaagaagtggggagatagtagaaggagaagtagaagattcagaaaagattgatttaccacctggtttcagatttcacccaactgatgaagaacttataacacactatctaagaccaaaggttgtaaactcttttttctctgctatagctattggtgaagttgatctcaacaaagtcgagccttgggacttgccttgtaagttataggtcatttattttctaggtttttaaaaaccttctatgttttgttacttctaaacactgtttttttttagggaaggctaagcttggggaaaaagagtggtacttcttttgcgtaagagaccgaaaatacccgactggtttaagaacgaatcgtgctactaaagccggttattggaaagctacagggaaagataaagagatcttcaaagggaaatctcttgttggtatgaagaaaacattggttttctacaaaggaagagctcctaaaggagtaaaaacaaattgggtcatgcatgagtatcgattagaaggcaaattcgctatcgataatctctctaaaaccgctaaggtaacattaatatattaatatatatcatagttcttctctgtttttgttgtgacatgatgttttttttatgcaaagccaaaggtaatatgtatattgatttataatgttttcttgtgttgtttgtggatgcagaacgaatgtgttattagtcgtgtttttcatacacggactgatggtacgaaggagcatatgtccgttggtttacctccgctgatggattcttctccatatctaaagagtagaggacaagactctttagccgggaccacccttggtgggttgttgtctcacgttacctacttctccgaccaaacaaccgatgacaagagtcttgtggccgattttaaaactaccatgtttggttccggatcgactaactttttaccaaacataggttctctactagacttcgatcctctgtttctacaaaacaattcttcagtactgaagatgttgcttgacaatgaagaaacccaatttaagaagaatcttcacaattcaggttcatcagagagtgaactaacagcgagttcttggcaaggtcacaattcttatggttccactggtccagtgaatcttgattgcgtttggaaattctgaatttggaaaatcgaaaatttggatgttaactagggggtatatagggtttttaaaaacagtgtatatatgcgttatgtgttagctttagattctaggatatacaaagatgacactaatagattcttataacattttgtaaaaaaaaatcattgtagtgaatactctcttgccatttgaaatccattgtgtttgcatatttaaggtgttcataaattgtcatgctgaattgtgtttgcatattctcattatttccctgtttgtaattaatgattgtaacatacctaagtagataatattagatt

>AT3G29035.1.exon.3
aacgaatgtgttattagtcgtgtttttcatacacggactgatggtacgaaggagcatatgtccgttggtttacctccgctgatggattcttctccatatctaaagagtagaggacaagactctttagccgggaccacccttggtgggttgttgtctcacgttacctacttctccgaccaaacaaccgatgacaagagtcttgtggccgattttaaaactaccatgtttggttccggatcgactaactttttaccaaacataggttctctactagacttcgatcctctgtttctacaaaacaattcttcagtactgaagatgttgcttgacaatgaagaaacccaatttaagaagaatcttcacaattcaggttcatcagagagtgaactaacagcgagttcttggcaaggtcacaattcttatggttccactggtccagtgaatcttgattgcgtttggaaattctgaatttggaaaatcgaaaatttggatgttaactagggggtatatagggtttttaaaaacagtgtatatatgcgttatgtgttagctttagattctaggatatacaaagatgacactaatagattcttataacattttgtaaaaaaaaatcattgtagtgaatactctcttgccatttgaaatccattgtgtttgcatatttaaggtgttcataaattgtcatgctgaattgtgtttgcatattctcattatttccctgtttgtaattaatgattgtaacatacctaagtagataatattagatt

(B)Standard Nucleotide BLAST - NCBI of NAC3 from TAIR and 1001 genomes project, #############################################################################################

RID: MCMARES5114	
Job Title:tairNAC3				
Program: BLASTN 
Subject:AT3G29035.1.NAC03_1001genomeID: lcl|Query_23471(dna) Length: 5000
Query #1: AT3G29035.1.NAC03_TAIR Query ID: lcl|Query_23469 Length: 1644

Sequences producing significant alignments:
                                                                  Scientific      Common                     Max    Total Query   E   Per.   Acc.                        
Description                                                       Name            Name            Taxid      Score  Score cover Value Ident  Len        Accession        
AT3G29035.1.NAC03_1001genome                                  0          2715   2715  89%   0.0   100.00 5000       Query_23471      


Alignments:

>AT3G29035.1.NAC03_1001genome
Sequence ID: Query_23471 Length: 5000
Range 1: 1 to 1470

Score:2715 bits(1470), Expect:0.0, 
Identities:1470/1470(100%),  Gaps:0/1470(0%), Strand: Plus/Plus

Query  175   ATGGATTACAAGGTATCAAGAAGTGGGGAGATAGTAGAAGGAGAAGTAGAAGATTCAGAA  234
             ||||||||||||||||||||||||||||||||||||||||||||||||||||||||||||
Sbjct  1     ATGGATTACAAGGTATCAAGAAGTGGGGAGATAGTAGAAGGAGAAGTAGAAGATTCAGAA  60

Query  235   AAGATTGATTTACCACCTGGTTTCAGATTTCACCCAACTGATGAAGAACTTATAACACAC  294
             ||||||||||||||||||||||||||||||||||||||||||||||||||||||||||||
Sbjct  61    AAGATTGATTTACCACCTGGTTTCAGATTTCACCCAACTGATGAAGAACTTATAACACAC  120

Query  295   TATCTAAGACCAAAGGTTGTAAACTCTTTTTTCTCTGCTATAGCTATTGGTGAAGTTGAT  354
             ||||||||||||||||||||||||||||||||||||||||||||||||||||||||||||
Sbjct  121   TATCTAAGACCAAAGGTTGTAAACTCTTTTTTCTCTGCTATAGCTATTGGTGAAGTTGAT  180

Query  355   CTCAACAAAGTCGAGCCTTGGGACTTGCCTTGTAAGTTATAGGTCATTTATTTTCTAGGT  414
             ||||||||||||||||||||||||||||||||||||||||||||||||||||||||||||
Sbjct  181   CTCAACAAAGTCGAGCCTTGGGACTTGCCTTGTAAGTTATAGGTCATTTATTTTCTAGGT  240

Query  415   TTTTAAAAACCTTCTATGTTTTGTTACTTCTAAACACTGtttttttttAGGGAAGGCTAA  474
             ||||||||||||||||||||||||||||||||||||||||||||||||||||||||||||
Sbjct  241   TTTTAAAAACCTTCTATGTTTTGTTACTTCTAAACACTGTTTTTTTTTAGGGAAGGCTAA  300

Query  475   GCTTGGGGAAAAAGAGTGGTACTTCTTTTGCGTAAGAGACCGAAAATACCCGACTGGTTT  534
             ||||||||||||||||||||||||||||||||||||||||||||||||||||||||||||
Sbjct  301   GCTTGGGGAAAAAGAGTGGTACTTCTTTTGCGTAAGAGACCGAAAATACCCGACTGGTTT  360

Query  535   AAGAACGAATCGTGCTACTAAAGCCGGTTATTGGAAAGCTACAGGGAAAGATAAAGAGAT  594
             ||||||||||||||||||||||||||||||||||||||||||||||||||||||||||||
Sbjct  361   AAGAACGAATCGTGCTACTAAAGCCGGTTATTGGAAAGCTACAGGGAAAGATAAAGAGAT  420

Query  595   CTTCAAAGGGAAATCTCTTGTTGGTATGAAGAAAACATTGGTTTTCTACAAAGGAAGAGC  654
             ||||||||||||||||||||||||||||||||||||||||||||||||||||||||||||
Sbjct  421   CTTCAAAGGGAAATCTCTTGTTGGTATGAAGAAAACATTGGTTTTCTACAAAGGAAGAGC  480

Query  655   TCCTAAAGGAGTAAAAACAAATTGGGTCATGCATGAGTATCGATTAGAAGGCAAATTCGC  714
             ||||||||||||||||||||||||||||||||||||||||||||||||||||||||||||
Sbjct  481   TCCTAAAGGAGTAAAAACAAATTGGGTCATGCATGAGTATCGATTAGAAGGCAAATTCGC  540

Query  715   TATCGATAATCTCTCTAAAACCGCTAAGGTAACATTAATATATTAATATATATCATAGTT  774
             ||||||||||||||||||||||||||||||||||||||||||||||||||||||||||||
Sbjct  541   TATCGATAATCTCTCTAAAACCGCTAAGGTAACATTAATATATTAATATATATCATAGTT  600

Query  775   CTTCTCTGTTTTTGTTGTGACATGATGttttttttATGCAAAGCCAAAGGTAATATGTAT  834
             ||||||||||||||||||||||||||||||||||||||||||||||||||||||||||||
Sbjct  601   CTTCTCTGTTTTTGTTGTGACATGATGTTTTTTTTATGCAAAGCCAAAGGTAATATGTAT  660

Query  835   ATTGATTTATAATGTTTTCTTGTGTTGTTTGTGGATGCAGAACGAATGTGTTATTAGTCG  894
             ||||||||||||||||||||||||||||||||||||||||||||||||||||||||||||
Sbjct  661   ATTGATTTATAATGTTTTCTTGTGTTGTTTGTGGATGCAGAACGAATGTGTTATTAGTCG  720

Query  895   TGTTTTTCATACACGGACTGATGGTACGAAGGAGCATATGTCCGTTGGTTTACCTCCGCT  954
             ||||||||||||||||||||||||||||||||||||||||||||||||||||||||||||
Sbjct  721   TGTTTTTCATACACGGACTGATGGTACGAAGGAGCATATGTCCGTTGGTTTACCTCCGCT  780

Query  955   GATGGATTCTTCTCCATATCTAAAGAGTAGAGGACAAGACTCTTTAGCCGGGACCACCCT  1014
             ||||||||||||||||||||||||||||||||||||||||||||||||||||||||||||
Sbjct  781   GATGGATTCTTCTCCATATCTAAAGAGTAGAGGACAAGACTCTTTAGCCGGGACCACCCT  840

Query  1015  TGGTGGGTTGTTGTCTCACGTTACCTACTTCTCCGACCAAACAACCGATGACAAGAGTCT  1074
             ||||||||||||||||||||||||||||||||||||||||||||||||||||||||||||
Sbjct  841   TGGTGGGTTGTTGTCTCACGTTACCTACTTCTCCGACCAAACAACCGATGACAAGAGTCT  900

Query  1075  TGTGGCCGATTTTAAAACTACCATGTTTGGTTCCGGATCGACTAACTTTTTACCAAACAT  1134
             ||||||||||||||||||||||||||||||||||||||||||||||||||||||||||||
Sbjct  901   TGTGGCCGATTTTAAAACTACCATGTTTGGTTCCGGATCGACTAACTTTTTACCAAACAT  960

Query  1135  AGGTTCTCTACTAGACTTCGATCCTCTGTTTCTACAAAACAATTCTTCAGTACTGAAGAT  1194
             ||||||||||||||||||||||||||||||||||||||||||||||||||||||||||||
Sbjct  961   AGGTTCTCTACTAGACTTCGATCCTCTGTTTCTACAAAACAATTCTTCAGTACTGAAGAT  1020

Query  1195  GTTGCTTGACAATGAAGAAACCCAATTTAAGAAGAATCTTCACAATTCAGGTTCATCAGA  1254
             ||||||||||||||||||||||||||||||||||||||||||||||||||||||||||||
Sbjct  1021  GTTGCTTGACAATGAAGAAACCCAATTTAAGAAGAATCTTCACAATTCAGGTTCATCAGA  1080

Query  1255  GAGTGAACTAACAGCGAGTTCTTGGCAAGGTCACAATTCTTATGGTTCCACTGGTCCAGT  1314
             ||||||||||||||||||||||||||||||||||||||||||||||||||||||||||||
Sbjct  1081  GAGTGAACTAACAGCGAGTTCTTGGCAAGGTCACAATTCTTATGGTTCCACTGGTCCAGT  1140

Query  1315  GAATCTTGATTGCGTTTGGAAATTCTGAATTTGGAAAATCGAAAATTTGGATGTTAACTA  1374
             ||||||||||||||||||||||||||||||||||||||||||||||||||||||||||||
Sbjct  1141  GAATCTTGATTGCGTTTGGAAATTCTGAATTTGGAAAATCGAAAATTTGGATGTTAACTA  1200

Query  1375  GGGGGTATATAGGGTTTTTAAAAACAGTGTATATATGCGTTATGTGTTAGCTTTAGATTC  1434
             ||||||||||||||||||||||||||||||||||||||||||||||||||||||||||||
Sbjct  1201  GGGGGTATATAGGGTTTTTAAAAACAGTGTATATATGCGTTATGTGTTAGCTTTAGATTC  1260

Query  1435  TAGGATATACAAAGATGACACTAATAGATTCTTATAACATTTTGTaaaaaaaaaTCATTG  1494
             ||||||||||||||||||||||||||||||||||||||||||||||||||||||||||||
Sbjct  1261  TAGGATATACAAAGATGACACTAATAGATTCTTATAACATTTTGTAAAAAAAAATCATTG  1320

Query  1495  TAGTGAATACTCTCTTGCCATTTGAAATCCATTGTGTTTGCATATTTAAGGTGTTCATAA  1554
             ||||||||||||||||||||||||||||||||||||||||||||||||||||||||||||
Sbjct  1321  TAGTGAATACTCTCTTGCCATTTGAAATCCATTGTGTTTGCATATTTAAGGTGTTCATAA  1380

Query  1555  ATTGTCATGCTGAATTGTGTTTGCATATTCTCATTATTTCCCTGTTTGTAATTAATGATT  1614
             ||||||||||||||||||||||||||||||||||||||||||||||||||||||||||||
Sbjct  1381  ATTGTCATGCTGAATTGTGTTTGCATATTCTCATTATTTCCCTGTTTGTAATTAATGATT  1440

Query  1615  GTAACATACCTAAGTAGATAATATTAGATT  1644
             ||||||||||||||||||||||||||||||
Sbjct  1441  GTAACATACCTAAGTAGATAATATTAGATT  1470

(C)Standard Nucleotide BLAST - NCBI of NAC3 from 1001 genomes project and exon 3 #############################################################################
RID: MCMHZTRD114	
Job Title:1001nac				
Program: BLASTN 
Subject:AT3G29035.1.exon.3 ID: lcl|Query_12543(dna) Length: 770
Query #1: AT3G29035.1.NAC03_1001genome Query ID: lcl|Query_12541 Length: 5000

Sequences producing significant alignments:
                                                                  Scientific      Common                     Max    Total Query   E   Per.   Acc.                        
Description                                                       Name            Name            Taxid      Score  Score cover Value Ident  Len        Accession        
AT3G29035.1.exon.3                                                                                0          1423   1423  15%   0.0   100.00 770        Query_12543      


Alignments:

>AT3G29035.1.exon.3
Sequence ID: Query_12543 Length: 770
Range 1: 1 to 770

Score:1423 bits(770), Expect:0.0, 
Identities:770/770(100%),  Gaps:0/770(0%), Strand: Plus/Plus

Query  701   AACGAATGTGTTATTAGTCGTGTTTTTCATACACGGACTGATGGTACGAAGGAGCATATG  760
             ||||||||||||||||||||||||||||||||||||||||||||||||||||||||||||
Sbjct  1     AACGAATGTGTTATTAGTCGTGTTTTTCATACACGGACTGATGGTACGAAGGAGCATATG  60

Query  761   TCCGTTGGTTTACCTCCGCTGATGGATTCTTCTCCATATCTAAAGAGTAGAGGACAAGAC  820
             ||||||||||||||||||||||||||||||||||||||||||||||||||||||||||||
Sbjct  61    TCCGTTGGTTTACCTCCGCTGATGGATTCTTCTCCATATCTAAAGAGTAGAGGACAAGAC  120

Query  821   TCTTTAGCCGGGACCACCCTTGGTGGGTTGTTGTCTCACGTTACCTACTTCTCCGACCAA  880
             ||||||||||||||||||||||||||||||||||||||||||||||||||||||||||||
Sbjct  121   TCTTTAGCCGGGACCACCCTTGGTGGGTTGTTGTCTCACGTTACCTACTTCTCCGACCAA  180

Query  881   ACAACCGATGACAAGAGTCTTGTGGCCGATTTTAAAACTACCATGTTTGGTTCCGGATCG  940
             ||||||||||||||||||||||||||||||||||||||||||||||||||||||||||||
Sbjct  181   ACAACCGATGACAAGAGTCTTGTGGCCGATTTTAAAACTACCATGTTTGGTTCCGGATCG  240

Query  941   ACTAACTTTTTACCAAACATAGGTTCTCTACTAGACTTCGATCCTCTGTTTCTACAAAAC  1000
             ||||||||||||||||||||||||||||||||||||||||||||||||||||||||||||
Sbjct  241   ACTAACTTTTTACCAAACATAGGTTCTCTACTAGACTTCGATCCTCTGTTTCTACAAAAC  300

Query  1001  AATTCTTCAGTACTGAAGATGTTGCTTGACAATGAAGAAACCCAATTTAAGAAGAATCTT  1060
             ||||||||||||||||||||||||||||||||||||||||||||||||||||||||||||
Sbjct  301   AATTCTTCAGTACTGAAGATGTTGCTTGACAATGAAGAAACCCAATTTAAGAAGAATCTT  360

Query  1061  CACAATTCAGGTTCATCAGAGAGTGAACTAACAGCGAGTTCTTGGCAAGGTCACAATTCT  1120
             ||||||||||||||||||||||||||||||||||||||||||||||||||||||||||||
Sbjct  361   CACAATTCAGGTTCATCAGAGAGTGAACTAACAGCGAGTTCTTGGCAAGGTCACAATTCT  420

Query  1121  TATGGTTCCACTGGTCCAGTGAATCTTGATTGCGTTTGGAAATTCTGAATTTGGAAAATC  1180
             ||||||||||||||||||||||||||||||||||||||||||||||||||||||||||||
Sbjct  421   TATGGTTCCACTGGTCCAGTGAATCTTGATTGCGTTTGGAAATTCTGAATTTGGAAAATC  480

Query  1181  GAAAATTTGGATGTTAACTAGGGGGTATATAGGGTTTTTAAAAACAGTGTATATATGCGT  1240
             ||||||||||||||||||||||||||||||||||||||||||||||||||||||||||||
Sbjct  481   GAAAATTTGGATGTTAACTAGGGGGTATATAGGGTTTTTAAAAACAGTGTATATATGCGT  540

Query  1241  TATGTGTTAGCTTTAGATTCTAGGATATACAAAGATGACACTAATAGATTCTTATAACAT  1300
             ||||||||||||||||||||||||||||||||||||||||||||||||||||||||||||
Sbjct  541   TATGTGTTAGCTTTAGATTCTAGGATATACAAAGATGACACTAATAGATTCTTATAACAT  600

Query  1301  TTTGTaaaaaaaaaTCATTGTAGTGAATACTCTCTTGCCATTTGAAATCCATTGTGTTTG  1360
             ||||||||||||||||||||||||||||||||||||||||||||||||||||||||||||
Sbjct  601   TTTGTAAAAAAAAATCATTGTAGTGAATACTCTCTTGCCATTTGAAATCCATTGTGTTTG  660

Query  1361  CATATTTAAGGTGTTCATAAATTGTCATGCTGAATTGTGTTTGCATATTCTCATTATTTC  1420
             ||||||||||||||||||||||||||||||||||||||||||||||||||||||||||||
Sbjct  661   CATATTTAAGGTGTTCATAAATTGTCATGCTGAATTGTGTTTGCATATTCTCATTATTTC  720

Query  1421  CCTGTTTGTAATTAATGATTGTAACATACCTAAGTAGATAATATTAGATT  1470
             ||||||||||||||||||||||||||||||||||||||||||||||||||
Sbjct  721   CCTGTTTGTAATTAATGATTGTAACATACCTAAGTAGATAATATTAGATT  770


(E)NAC048 FASTA sequences of COL-0, a exon 3 and Exon 5 ###############################################################################################
>AT3G04420.1_NAC048_1001genome
ATGGAGAATCCGGTGGGTTTAAGATTCCGtCCGACCGACAAGGAGATCGTCGTCGATTAcCTCCGACCAAAAAACTCCGATAGGGACACGAGTCATGTTGATCGAGTCATtagCACAGTCACTATCCGTAGCTTCGAcCCTTGGGAGTTACCTTGTAAGTGTTTTCACGAGTTTTCCTCTCGAACCATCGGCTACTTTCTAAGTTTAGGGTTTTTCTTTTTggGCAGGCCAGTCtAGGATCAAACTGAAAGATGAGTCTTGGTGTTTCTTCAGCCCTAAGGAGAACAAATATGGCAGAGGTGATCAACAAATTAGAAAAACGAAATCTGGTTACTGGAAGATTACTGGCAAACCAAAGCCTATCTTGCGTAACCGCCAAGAGATCGGTGAGAAAAAGGTTTTGATGTTTTACATGAGTAAGGAACTTGgtggatccaaatccgactgggttatgcacgagtaccatgctttctctcctactcaggttttttttccctctgtttttgctctttaccgtgatttgattgctcgttttcGTGTATCGGGTGATTGTGATTTGACTGAATgTTTTTTACAGATGATGATGACATATACAATATGTAAAGTTAtGTTTAAGGgTGAcGTGAGAGAGATTTCTTCTTCTTCTGcttCTTCTTATgGTAGTGAAATTGAGCAGAGTCGTGACTCTTTAATCCCTCTTCTTGTGAACGATTCTGAGGTTTGTCGATCTCAAaACTTTcTCTGTTTCTCTTTTAAATCCGATAACTGACTTGTTTTGTTGGTTGGTGATGTGCAGGAAGAaGCTCAAATCGAgGATGCTATACCaATAGAGGAATGGGAAACATGGtTGACTGATGATgGTGTTGATGagcaggtgaatcatattatgaatatgaaagatgatcgcaacaaccacaggcctcaaaagccattgactggtgtcttgattgacgatagtagtgatgatgatgatgattctgatttgctatctccaacaacagtaagcaatgttcacctttataatcctctctctgttttcagttttcaactcacaaagctaattttggtttatatcacagaattctattgaaaattcgagcacTTgTGATAGTTTTGGTAGCTCAGACCAAATCAACTTAgTGTCACTAACTCAAGAGGTGAGCTTTATATTATCTCTTTTTTTCAGTGATACAAACAATCCCTAATGCTACTTTGTGCCAGCACTCGCTAAAAAtTTTCGTTTCTTtTGATATGATTcAAGGTGAGCCAAGCTCTGATAACCAGTATTGATACACCCGAGAAGATTAAGAGTCCTTATGATGATGCACAAGGGACTGGGGCTGGAGgGCAAAAATTGGGtCAAGAGActCGAGAGAAGAAAcGAGCTGGTTTCTTTCACAGGATGATACAAAtATTCGTCAAGAAAaTTCACcaATGTTCTTCTATCTCAAGAACATAATAGCAGTAAATGAGATCAAAAACACCATTTGTACTTTCCAAAatcttgttttgctatgtaTaTCTTGTTTTGTAaCTTTTCCATAACTgTATGTGTGTCTTAATATATAAAGATGGTGAAtCTGTGATAAGAAAGTGGTTAGAGAAGACAAATTtGTATCAGTTGACTTAACAATGTCTATCTTGTTTTGTAACTTTCTCATCTTGTGTgTCCATTGTGaAGACAAAgTTGTATAATTTCAATTCACACAGCTAACCAAATGGTCTAATTTTCTTTGACTTAGCAATTAACCTCGAGTACGTTACCTAACCCCACTAaAAAAATTCCGTTCAACAAAAGAAAACAAGATTAAATTTCAAATCAAGATGTCAAGAgTCTCTGTTTGGACTAATAAGTCTACATCATACATGTAcacgtgcatgttgtCATGTtGATGGCtAAGTCTAGAACaCATTAGACTAATGCTAACtTTTATTCTTCTTCCTCTTTATAAGATCATTTGTTTACATTATCATATATCatttttttattttgtttttttaatctttttctacattactttcactctgtttctagattaaatcctctgtttcggtgttcaacttgcaagtttttcttttTACTATAtATCAACTTACCTCAtTCGTTAGaTATATTgTaTATAGAATTAAGGAATTTTCTTGtTTTGCCCAAATAAAATGaATTaTGTTGTTATAATTTGCTGaATTaATGTTGTTATATTGGAAATGAATCTTTTGAATATaAAGATATgCGCCTGCAACTTTTATTTATATTTTAAAATATTCGTGGAAGGTCGTGAAAtATAGTACAGCAAAGCAATCTAACAGGCCGAACAAAAAGAGAAAAATACAATAGGAAAAATTTGTAAAAGATGAaAaGATTCCAAATAGCCTTTTTGGTTTTGGATTTTTTCTCGAAGTGGTTGAAACTGAGCCATTCGTTGAAAAGTAAGTGCGGCGCTTGAGATTTGATGCTCCCACGTGGcCCAATGTAACTCACGTATCTAGATTTGGTCGTTATTGGCGTTTGTTTGGAaACACAACTTGGGCCACCACTACTACTTCACATTCCCCTACTCCCAAcTCCTGCGGAACAGAGAATCAAAAGTATAATAATAGTATGTACTGTGTTTTGAATAAATAATTCGTTATTAaAGTTTGGCAAAGAAAATGCTTCGTTTAAAGTTGTCTCACATAGTCACATTGGAGTTTTCTGCgGTATCTTGTTCACACGCGTGTCCATTTTCTCCGAAAAGGAGGCCGCTGGATTCAcCTTGTTCCAGTGACTGTAAAAgGGGAGttttTTtTtTttttTTTTaAATTAGTAGGAAAATTTTACGGTTTTACCATAACTATTATGATACAAATTTATATATGAATAAATTATATATCTGAAAACAAATAaTTTTGGATATTCGGAttattattttcTTATTTTTATATTATCTACATACGTACATGAGTTAAATCGGTGAAACAATCCCAATGAAAATGATCGAATTGATGGTGATCAATCCACTTATCGGTGTGGTATACTTGGAGAAGCTCGTCTAAGcCATtACAATAATCTCCGCCATAATCTTCGTTCTTGTTCTCCGTCAGCATCTAAAAAAAGTCATATATATTTCaAATTTGGTTATAAACTTCATATCAAATCATTATAATCTGAAACTTGAAACAaAAAGGAAATACAGTAATTCTATGACTTCTATCTGAACGATTTGTAATAAGACAGAACCAGATtAACCAAAAATATTGGTTCCTTTGgAAAAAAAAAatGATCATTTTAAGAAAATAATTAagacggaaacgttataaatcaaacATTTTTGaTTTATAAAATTGAAGTATGAACCAACACTAAcAAATTTAATGACtTTTTTCCCCTCCCATATTTTAACTTCTTAAgtAACCTGGGGGTGGTGAAGGATAGGGTcTGAAGTGAGAGAAAGATCTAAAGTCGGCGGAaATTCCTCTGAGATGGCGCCACTTCGTCTAGTTCttgTtgTCTTtttcgttagtttgcagagaacaaatgcgtccttcaaatgattatatatagagtcagccactaattaatgtttttatatatatacatacgtgtgtatatgtagatatatatatatagatatatatatagataccttgttgggatgggggagAAAGGAATGAAATTCATGGATAATCCAaTTGGTCTTCTGTTGTTGGGTgGTAGTGGTGGATAACGAGGAAGAAGAAGATCTTTTGTTTTCTTGGAAAACAAGAAATTTCTTTAAACCGATAGGGTTACCATCAACGTCCTTAATGGTACGACTATTTCCGGTTATCTTCCAGTGCCCTGACCTCGACACCCTCTTCGTTCGGTTGAGcTTCCCAAACTTCTCCACCGGCGATATGAAGTACCAAGTATGACTCGATTCTATCTTCGCCAGCCCTTTtCAAAACAcACATAAAAATGAAGAAGAAATGTTAAGAGTCTAGACATGGGGTTTAATTAGGGTATAgAATTTTATGGTTtatatatatAGTATAATTTACCAGGTAAATCtgcaggTTCATGGTGcaATATATTGACCTCGGCGATTTGCTTCCCCACTAGATCATCATTCTcTGTGATCTTGTTATTCAAGTAATAGTTAATGAGTTCTTCTTCAGGTGGGTTAAATGTGCATCTATACATCTCTATTAGCTGAGAGAGACGATTTTTCTTTTTGGGACAGATGAGATACAAACGGAGATATAGCTAGTAAAAAaCaAAAAAAATATATTTTCGAGATTGTaATAGAGTTTTAGTGATGATTTAGAAtTAAGAAGAAAAAAACAAGATAGGAGATTGGCTAACTTAAATAGgAaTTTTCGCTGATACTGCTTGGCTACATAACTTGTAAAAAGGACAAAAACATATTATTATTATTATAAGAAAAAGAAACAAAGACATGAAGAAGGCAAAACAAAGAAGTGATCAAATCAAAGCGCTTTATAGAAAACGACAAAAAAGCATGCACATTGATGAGAAGGACTCATGTGAGTGCAAACCACATGATATCTTAATTTTCCAAAATATTCGTCAGTTGATATAAGTATTATCGCcGGATCCTAATAAAACATCGGAACATTTGATTTGGACGGTCTTTAGGCTATATTGCTTTCTTTAACCCAAAAACTTCCAtGCTAAAATATTTCAATAATGAAAAAGGAGAGTCCCATAATTTGCGGTGAAAATGTTgTcACCTTTTTCGCTTTACATGTGACTTATAAATAATAAcCCCCCACTTGAAGTTGAAATATAATACCTTCATACTAATAGAAACATTCAAGGcAAGGAAAGAATATATAACTCGGGATTCACTCCATTgtttatatactaatttttattttgttttTTTTCCATGTATTGATATTTCGTATTTAGTTAGACAAAAGTCACAAAACACATATTGAAGATTTTGTTTTTGTTTCAAAGATAATGTAATAAACATAATATtTAATGTTGTGAAGAAAATTATACAATATTGTCATTTATTTTATGAATGC

>AT3G04420.1_NAC048_TAIR TGAAATTTAGAATCTGCGCATATAAATACATAAAACCCTATTCGATCTCTTTCTTCTCCAATCTAAGTTGCAGAACCATGGCCAAAACTCTCTACTGCAATTTTTTTTGATCTTTTCTTTTACTTTTTCTCTTCGTAATCGCTGGTTCGAGAAATGGAGAATCCGGTGGGTTTAAGATTCCGTCCGACCGACAAGGAGATCGTCGTCGATTACCTCCGACCAAAAAACTCCGATAGGGACACGAGTCATGTTGATCGAGTCATTAGCACAGTCACTATCCGTAGCTTCGACCCTTGGGAGTTACCTTGTAAGTGTTTTCACGAGTTTTCCTCTCGAACCATCGGCTACTTTCTAAGTTTAGGGTTTTTCTTTTTGGGCAGGCCAGTCTAGGATCAAACTGAAAGATGAGTCTTGGTGTTTCTTCAGCCCTAAGGAGAACAAATATGGCAGAGGTGATCAACAAATTAGAAAAACGAAATCTGGTTACTGGAAGATTACTGGCAAACCAAAGCCTATCTTGCGTAACCGCCAAGAGATCGGTGAGAAAAAGGTTTTGATGTTTTACATGAGTAAGGAACTTGGTGGATCCAAATCCGACTGGGTTATGCACGAGTACCATGCTTTCTCTCCTACTCAGGTTTTTTTTCCCTCTGTTTTTGCTCTTTACCGTGATTTGATTGCTCGTTTTCGTGTATCGGGTGATTGTGATTTGACTGAATGTTTTTTACAGATGATGATGACATATACAATATGTAAAGTTATGTTTAAGGGTGACGTGAGAGAGATTTCTTCTTCTTCTGCTTCTTATGGTAGTGAAATTGAGCAGAGTCGTGACTCTTTAATCCCTCTTCTTGTGAACGATTCTGAGGTTTGTCGATCTCAAAACTTTCTCTGTTTCTCTTTTAAATCCGATAACTGACTTGTTTTGTTGGTTGGTGATGTGCAGGAAGAAGCTCAAATCGAGGATGCTATACCAATAGAGGAATGGGAAACATGGTTGACTGATGATGGTGTTGATGAGCAGGTGAATCATATTATGAATATGAAAGATGATCGCAACAACCACAGGCCTCAAAAGCCATTGACTGGTGTCTTGATTGACGATAGTAGTGATGATGATGATGATTCTGATTTGCTATCTCCAACAACAGTAAGCAATGTTCACCTTTATAATCCTCTCTCTGTTTTCAGTTTTCAACTCACAAAGCTAATTTTGGTTTATATCACAGAATTCTATTGAAAATTCGAGCACTTGTGATAGTTTTGGTAGCTCAGACCAAATCAACTTAGTGTCACTAACTCAAGAGGTGAGCTTTATATTATCTCTTTTTTTCAGTGATACAAACAATCCCTAATGCTACTTTGTGCCAGCACTCGCTAAAAATTTTCGTTTCTTATGATATGATTCAAGGTGAGCCAAGCTCTGATAACCAGTATTGATACACCCGAGAAGATTAAGAGTCCTTATGATGATGCACAAGGGACTGGGGCTGGAGGGCAAAAATTGGGTCAAGAGACTCGAGAGAAGAAACGAGCTGGTTTCTTTCACAGGATGATACAAATATTCGTCAAGAAAATTCACCAATGTTCTTCTATCTCAAGAACATAATAGCAGTAAATGAGATCAAAAACACCATTTGTACTTTCCAAAATCTTGTTTTGCTATGTATATCTTGTTTTGTAACTTTTCCATAACTGTATGTGTGTCTTAATATATAAAGATGGTGAAACTGTGATAAGAAAGTGGTTAGAGAAGACAAATTTGTATCAGTTGACTTAACAATGTCTATCTTGTTTTGTAACTTTCTCATCTTGTGTGTCC

>AT3G04420.1.exon.3
atgatgatgacatatacaatatgtaaagttatgtttaagggtgacgtgagagagatttcttcttcttctgcttcttatggtagtgaaattgagcagagtcgtgactctttaatccctcttcttgtgaacgattctgag

>AT3G04420.1.exon.5
aattctattgaaaattcgagcacttgtgatagttttggtagctcagaccaaatcaacttagtgtcactaactcaagag

(F)Standard Nucleotide BLAST - NCBI of NAC048 from TAIR and 1001 genomes project  5#############################################################################################
RID: MCVWA75Y114	
Job Title:Nucleotide Sequence 				
Program: BLASTN 
Subject:None ID: lcl|Query_29859(dna) Length: 5013
Query #1:  Query ID: lcl|Query_29857 Length: 1822

Sequences producing significant alignments:
                                                                  Scientific      Common                     Max    Total Query   E   Per.   Acc.                        
Description                                                       Name            Name            Taxid      Score  Score cover Value Ident  Len        Accession        
None provided                                                                                     0          3057   3057  91%   0.0   99.70  5013       Query_29859      


Alignments:

>
Sequence ID: Query_29859 Length: 5013
Range 1: 1 to 1672

Score:3057 bits(1655), Expect:0.0, 
Identities:1667/1672(99%),  Gaps:3/1672(0%), Strand: Plus/Plus

Query  154   ATGGAGAATCCGGTGGGTTTAAGATTCCGTCCGACCGACAAGGAGATCGTCGTCGATTAC  213
             ||||||||||||||||||||||||||||||||||||||||||||||||||||||||||||
Sbjct  1     ATGGAGAATCCGGTGGGTTTAAGATTCCGTCCGACCGACAAGGAGATCGTCGTCGATTAC  60

Query  214   CTCCGACCAAAAAACTCCGATAGGGACACGAGTCATGTTGATCGAGTCATTAGCACAGTC  273
             ||||||||||||||||||||||||||||||||||||||||||||||||||||||||||||
Sbjct  61    CTCCGACCAAAAAACTCCGATAGGGACACGAGTCATGTTGATCGAGTCATTAGCACAGTC  120

Query  274   ACTATCCGTAGCTTCGACCCTTGGGAGTTACCTTGTAAGTGTTTTCACGAGTTTTCCTCT  333
             ||||||||||||||||||||||||||||||||||||||||||||||||||||||||||||
Sbjct  121   ACTATCCGTAGCTTCGACCCTTGGGAGTTACCTTGTAAGTGTTTTCACGAGTTTTCCTCT  180

Query  334   CGAACCATCGGCTACTTTCTAAGTTTAGGGTTTTTCTTTTTGGGCAGGCCAGTCTAGGAT  393
             ||||||||||||||||||||||||||||||||||||||||||||||||||||||||||||
Sbjct  181   CGAACCATCGGCTACTTTCTAAGTTTAGGGTTTTTCTTTTTGGGCAGGCCAGTCTAGGAT  240

Query  394   CAAACTGAAAGATGAGTCTTGGTGTTTCTTCAGCCCTAAGGAGAACAAATATGGCAGAGG  453
             ||||||||||||||||||||||||||||||||||||||||||||||||||||||||||||
Sbjct  241   CAAACTGAAAGATGAGTCTTGGTGTTTCTTCAGCCCTAAGGAGAACAAATATGGCAGAGG  300

Query  454   TGATCAACAAATTAGAAAAACGAAATCTGGTTACTGGAAGATTACTGGCAAACCAAAGCC  513
             ||||||||||||||||||||||||||||||||||||||||||||||||||||||||||||
Sbjct  301   TGATCAACAAATTAGAAAAACGAAATCTGGTTACTGGAAGATTACTGGCAAACCAAAGCC  360

Query  514   TATCTTGCGTAACCGCCAAGAGATCGGTGAGAAAAAGGTTTTGATGTTTTACATGAGTAA  573
             ||||||||||||||||||||||||||||||||||||||||||||||||||||||||||||
Sbjct  361   TATCTTGCGTAACCGCCAAGAGATCGGTGAGAAAAAGGTTTTGATGTTTTACATGAGTAA  420

Query  574   GGAACTTGGTGGATCCAAATCCGACTGGGTTATGCACGAGTACCATGCTTTCTCTCCTAC  633
             ||||||||||||||||||||||||||||||||||||||||||||||||||||||||||||
Sbjct  421   GGAACTTGGTGGATCCAAATCCGACTGGGTTATGCACGAGTACCATGCTTTCTCTCCTAC  480

Query  634   TCAGGttttttttCCCTCTGTTTTTGCTCTTTACCGTGATTTGATTGCTCGTTTTCGTGT  693
             ||||||||||||||||||||||||||||||||||||||||||||||||||||||||||||
Sbjct  481   TCAGGTTTTTTTTCCCTCTGTTTTTGCTCTTTACCGTGATTTGATTGCTCGTTTTCGTGT  540

Query  694   ATCGGGTGATTGTGATTTGACTGAATGTTTTTTACAGATGATGATGACATATACAATATG  753
             ||||||||||||||||||||||||||||||||||||||||||||||||||||||||||||
Sbjct  541   ATCGGGTGATTGTGATTTGACTGAATGTTTTTTACAGATGATGATGACATATACAATATG  600

Query  754   TAAAGTTATGTTTAAGGGTGACGTGAGAGAGATTTCTTCTTCTTCTG---CTTCTTATGG  810
             |||||||||||||||||||||||||||||||||||||||||||||||   ||||||||||
Sbjct  601   TAAAGTTATGTTTAAGGGTGACGTGAGAGAGATTTCTTCTTCTTCTGCTTCTTCTTATGG  660

Query  811   TAGTGAAATTGAGCAGAGTCGTGACTCTTTAATCCCTCTTCTTGTGAACGATTCTGAGGT  870
             ||||||||||||||||||||||||||||||||||||||||||||||||||||||||||||
Sbjct  661   TAGTGAAATTGAGCAGAGTCGTGACTCTTTAATCCCTCTTCTTGTGAACGATTCTGAGGT  720

Query  871   TTGTCGATCTCAAAACTTTCTCTGTTTCTCTTTTAAATCCGATAACTGACTTGTTTTGTT  930
             ||||||||||||||||||||||||||||||||||||||||||||||||||||||||||||
Sbjct  721   TTGTCGATCTCAAAACTTTCTCTGTTTCTCTTTTAAATCCGATAACTGACTTGTTTTGTT  780

Query  931   GGTTGGTGATGTGCAGGAAGAAGCTCAAATCGAGGATGCTATACCAATAGAGGAATGGGA  990
             ||||||||||||||||||||||||||||||||||||||||||||||||||||||||||||
Sbjct  781   GGTTGGTGATGTGCAGGAAGAAGCTCAAATCGAGGATGCTATACCAATAGAGGAATGGGA  840

Query  991   AACATGGTTGACTGATGATGGTGTTGATGAGCAGGTGAATCATATTATGAATATGAAAGA  1050
             ||||||||||||||||||||||||||||||||||||||||||||||||||||||||||||
Sbjct  841   AACATGGTTGACTGATGATGGTGTTGATGAGCAGGTGAATCATATTATGAATATGAAAGA  900

Query  1051  TGATCGCAACAACCACAGGCCTCAAAAGCCATTGACTGGTGTCTTGATTGACGATAGTAG  1110
             ||||||||||||||||||||||||||||||||||||||||||||||||||||||||||||
Sbjct  901   TGATCGCAACAACCACAGGCCTCAAAAGCCATTGACTGGTGTCTTGATTGACGATAGTAG  960

Query  1111  TGATGATGATGATGATTCTGATTTGCTATCTCCAACAACAGTAAGCAATGTTCACCTTTA  1170
             ||||||||||||||||||||||||||||||||||||||||||||||||||||||||||||
Sbjct  961   TGATGATGATGATGATTCTGATTTGCTATCTCCAACAACAGTAAGCAATGTTCACCTTTA  1020

Query  1171  TAATCCTCTCTCTGTTTTCAGTTTTCAACTCACAAAGCTAATTTTGGTTTATATCACAGA  1230
             ||||||||||||||||||||||||||||||||||||||||||||||||||||||||||||
Sbjct  1021  TAATCCTCTCTCTGTTTTCAGTTTTCAACTCACAAAGCTAATTTTGGTTTATATCACAGA  1080

Query  1231  ATTCTATTGAAAATTCGAGCACTTGTGATAGTTTTGGTAGCTCAGACCAAATCAACTTAG  1290
             ||||||||||||||||||||||||||||||||||||||||||||||||||||||||||||
Sbjct  1081  ATTCTATTGAAAATTCGAGCACTTGTGATAGTTTTGGTAGCTCAGACCAAATCAACTTAG  1140

Query  1291  TGTCACTAACTCAAGAGGTGAGCTTTATATTATCTCtttttttCAGTGATACAAACAATC  1350
             ||||||||||||||||||||||||||||||||||||||||||||||||||||||||||||
Sbjct  1141  TGTCACTAACTCAAGAGGTGAGCTTTATATTATCTCTTTTTTTCAGTGATACAAACAATC  1200

Query  1351  CCTAATGCTACTTTGTGCCAGCACTCGCTAAAAATTTTCGTTTCTTATGATATGATTCAA  1410
             |||||||||||||||||||||||||||||||||||||||||||||| |||||||||||||
Sbjct  1201  CCTAATGCTACTTTGTGCCAGCACTCGCTAAAAATTTTCGTTTCTTTTGATATGATTCAA  1260

Query  1411  GGTGAGCCAAGCTCTGATAACCAGTATTGATACACCCGAGAAGATTAAGAGTCCTTATGA  1470
             ||||||||||||||||||||||||||||||||||||||||||||||||||||||||||||
Sbjct  1261  GGTGAGCCAAGCTCTGATAACCAGTATTGATACACCCGAGAAGATTAAGAGTCCTTATGA  1320

Query  1471  TGATGCACAAGGGACTGGGGCTGGAGGGCAAAAATTGGGTCAAGAGACTCGAGAGAAGAA  1530
             ||||||||||||||||||||||||||||||||||||||||||||||||||||||||||||
Sbjct  1321  TGATGCACAAGGGACTGGGGCTGGAGGGCAAAAATTGGGTCAAGAGACTCGAGAGAAGAA  1380

Query  1531  ACGAGCTGGTTTCTTTCACAGGATGATACAAATATTCGTCAAGAAAATTCACCAATGTTC  1590
             ||||||||||||||||||||||||||||||||||||||||||||||||||||||||||||
Sbjct  1381  ACGAGCTGGTTTCTTTCACAGGATGATACAAATATTCGTCAAGAAAATTCACCAATGTTC  1440

Query  1591  TTCTATCTCAAGAACATAATAGCAGTAAATGAGATCAAAAACACCATTTGTACTTTCCAA  1650
             ||||||||||||||||||||||||||||||||||||||||||||||||||||||||||||
Sbjct  1441  TTCTATCTCAAGAACATAATAGCAGTAAATGAGATCAAAAACACCATTTGTACTTTCCAA  1500

Query  1651  AATCTTGTTTTGCTATGTATATCTTGTTTTGTAACTTTTCCATAACTGTATGTGTGTCTT  1710
             ||||||||||||||||||||||||||||||||||||||||||||||||||||||||||||
Sbjct  1501  AATCTTGTTTTGCTATGTATATCTTGTTTTGTAACTTTTCCATAACTGTATGTGTGTCTT  1560

Query  1711  AATATATAAAGATGGTGAAACTGTGATAAGAAAGTGGTTAGAGAAGACAAATTTGTATCA  1770
             ||||||||||||||||||| ||||||||||||||||||||||||||||||||||||||||
Sbjct  1561  AATATATAAAGATGGTGAATCTGTGATAAGAAAGTGGTTAGAGAAGACAAATTTGTATCA  1620

Query  1771  GTTGACTTAACAATGTCTATCTTGTTTTGTAACTTTCTCATCTTGTGTGTCC  1822
             ||||||||||||||||||||||||||||||||||||||||||||||||||||
Sbjct  1621  GTTGACTTAACAATGTCTATCTTGTTTTGTAACTTTCTCATCTTGTGTGTCC  1672


(G)Standard Nucleotide BLAST - NCBI of NAC048 from 1001 genomes project and exon 3 #############################################################################
RID: MCW7U507114	
Job Title:Nucleotide Sequence 				
Program: BLASTN 
Subject:AT3G04420.1.exon.3 ID: lcl|Query_10729(dna) Length: 138
Query #1:  Query ID: lcl|Query_10727 Length: 5013

Sequences producing significant alignments:
                                                                  Scientific      Common                     Max    Total Query   E   Per.   Acc.                        
Description                                                       Name            Name            Taxid      Score  Score cover Value Ident  Len        Accession        
AT3G04420.1.exon.3                                                                                0          241    241   2%    2e-67 97.87  138        Query_10729      


Alignments:

>AT3G04420.1.exon.3
Sequence ID: Query_10729 Length: 138
Range 1: 1 to 138

Score:241 bits(130), Expect:2e-67, 
Identities:138/141(98%),  Gaps:3/141(2%), Strand: Plus/Plus

Query  578  ATGATGATGACATATACAATATGTAAAGTTATGTTTAAGGGTGACGTGAGAGAGATttct  637
            ||||||||||||||||||||||||||||||||||||||||||||||||||||||||||||
Sbjct  1    ATGATGATGACATATACAATATGTAAAGTTATGTTTAAGGGTGACGTGAGAGAGATTTCT  60

Query  638  tcttcttctgcttcttcttATGGTAGTGAAATTGAGCAGAGTCGTGACTCTTTAATCCCT  697
            ||||||||||   |||||||||||||||||||||||||||||||||||||||||||||||
Sbjct  61   TCTTCTTCTG---CTTCTTATGGTAGTGAAATTGAGCAGAGTCGTGACTCTTTAATCCCT  117

Query  698  CTTCTTGTGAACGATTCTGAG  718
            |||||||||||||||||||||
Sbjct  118  CTTCTTGTGAACGATTCTGAG  138


(H) Standard Nucleotide BLAST - NCBI of NAC048 from 1001 genomes project and exon 5
 #############################################################################
RID: MCW9NEWB11R	
Job Title:NAc0481001genom				
Program: BLASTN 
Subject:AT3G04420.1.exon.5 ID: lcl|Query_110881(dna) Length: 78
Query #1: AT3G04420.1_NAC048_1001genome Query ID: lcl|Query_110879 Length: 5013

Sequences producing significant alignments:
                                                                  Scientific      Common                     Max    Total Query   E   Per.   Acc.                        
Description                                                       Name            Name            Taxid      Score  Score cover Value Ident  Len        Accession        
AT3G04420.1.exon.5                                                                                0          145    145   1%    7e-39 100.00 78         Query_110881     


Alignments:

>AT3G04420.1.exon.5
Sequence ID: Query_110881 Length: 78
Range 1: 1 to 78

Score:145 bits(78), Expect:7e-39, 
Identities:78/78(100%),  Gaps:0/78(0%), Strand: Plus/Plus

Query  1080  AATTCTATTGAAAATTCGAGCACTTGTGATAGTTTTGGTAGCTCAGACCAAATCAACTTA  1139
             ||||||||||||||||||||||||||||||||||||||||||||||||||||||||||||
Sbjct  1     AATTCTATTGAAAATTCGAGCACTTGTGATAGTTTTGGTAGCTCAGACCAAATCAACTTA  60

Query  1140  GTGTCACTAACTCAAGAG  1157
             ||||||||||||||||||
Sbjct  61    GTGTCACTAACTCAAGAG  78


		


		
