# Supplementary material for: Combined Approach of GWAS and Phylogenetic Analyses to Identify New Candidate Genes That Participate in Arabidopsis thaliana Primary Root Development Using Cellular Measurements and Primary Root Length
Source: Plants (Basel). 2022 Nov 18;11(22):3162. doi: 10.3390/plants11223162 (PMC9697774; doi:10.3390/plants11223162)
Supplement: Supplementary file 1 [file plants-11-03162-s001.zip › Table S1. List of accessions.xlsx]

## Sheet: Hoja1
Table S1. List of accessions and their origin used in this study
Accession	ID	Country
AMEL-1	6990	NL	NETHERLANDS, THE			Accessions used for gene tree construction for whom there were available genomes
AN-1	6898	BE	BELGIUM
ANN-1	6994	FR	FRANCE
BA1-2	8256	SE	SWEDEN
BA4-1	8258	SE	SWEDEN
BA5-1	8259	SE	SWEDEN
BAA-1	7002	NL	NETHERLANDS, THE
BAY-0	6899	DE	GERMANY
BLA-1	7015	ES	SPAIN
BOOT-1	7026	UK	UNITED KINGDOM
BS-1	8270	CH	SWITZERLAND
BS-2	7004	CH	SWITZERLAND
BSCH-2	7032	DE	GERMANY
BU-2	#N/A	#N/A	#N/A
BUR-0	5719	IE	IRELAND
C24	6906	PT	PORTUGAL
CHAT-1	7071	FR	FRANCE
CHI-1	7073	RU	RUSSIAN FEDERATION
CIBC-5	6730	UK	UNITED KINGDOM
COL-0	6909	US	UNITED STATES
CRL-1	5731	UK	UNITED KINGDOM
CT-1	6910	IT	ITALY
CVI-0	6911	CV	CAPE VERDE
DI-1	7098	FR	FRANCE
DO-0	7102	DE	GERMANY
DRAII-1	8284	CZ	CZECH REPUBLIC
EDI-0	6914	UK	UNITED KINGDOM
EDI-8	9305	UK	UNITED KINGDOM
EDINBURGH-5	9302	UK	UNITED KINGDOM
EP-0	7123	DE	GERMANY
EST-1	6916	RU	RUSSIAN FEDERATION
GA-0	6919	DE	GERMANY
GD-1	8296	DE	GERMANY
GEL-1	7143	NL	NETHERLANDS, THE
GIE-0	7147	DE	GERMANY
GOT-7	6921	DE	GERMANY
GR-1	8300	AT	AUSTRIA
GU-0	6922	DE	GERMANY
HA-0	7163	DE	GERMANY
HEY-1	7166	NL	NETHERLANDS, THE
HI-0	8304	NL	NETHERLANDS, THE
HIL-1	5745	UK	UNITED KINGDOM
HS-0	8310	DE	GERMANY
HSM	8236	CZ	CZECH REPUBLIC
IS-1	7176	DE	GERMANY
JM-0	8313	CZ	CZECH REPUBLIC
JM-1	7178	CZ	CZECH REPUBLIC
KA-0	8314	AT	AUSTRIA
KAS-2	8424	IN	INDIA
KELSTERBACH-4	8420	DE	GERMANY
KIN-0	6926	US	UNITED STATES
KONDARA	6929	TJ	TAJIKISTAN
KR-0	7201	DE	GERMANY
KYL-1	5751	UK	UNITED KINGDOM
LAC-3	94	FR	FRANCE
LDV-58	149	FR	FRANCE
LER-1	6932	DE	GERMANY
LI-3	7224	DE	GERMANY
LI-7	7231	DE	GERMANY
LO-2	7242	DE	GERMANY
LOV-1	6043	SE	SWEDEN
LOV-5	6046	SE	SWEDEN
LP2-2	7520	CZ	CZECH REPUBLIC
LS-0	8312	CZ	CZECH REPUBLIC
LU-1	8334	SE	SWEDEN
MA-2	7246	DE	GERMANY
MH-0	7255	PL	POLAND
MIB-60	204	FR	FRANCE
MIB-86	224	FR	FRANCE
MIR-0	8337	IT	ITALY
MNF-POT-48	1859	US	UNITED STATES
MNZ-0	7244	DE	GERMANY
MOG-37	242	FR	FRANCE
MRK-0	6937	DE	GERMANY
MS-0	6938	RU	RUSSIAN FEDERATION
MT-0	6939	LY	LIBYAN ARAB JAMAHIRIYA
NA-1	8343	FR	FRANCE
ND-1	6942	CH	SWITZERLAND
NO-0	7275	DE	GERMANY
NW-0	8348	DE	GERMANY
NW-4	7262	DE	GERMANY
OB-0	7276	DE	GERMANY
OLD-1	7280	DE	GERMANY
OR-0	7282	DE	GERMANY
OVE-0	7287	DE	GERMANY
PER-1	8354	RU	RUSSIAN FEDERATION
PF-0	7297	DE	GERMANY
PHW-2	8243	IT	ITALY
PLA-0	7300	ES	SPAIN
PN-0	7307	FR	FRANCE
PO-1	7309	DE	GERMANY
POG-0	7306	CA	CANADA
PRO-0	8213	ES	SPAIN
PU2-7	6956	CZ	CZECH REPUBLIC
RA-0	6958	FR	FRANCE
RD-0	8366	DE	GERMANY
REN-1	6959	FR	FRANCE
ROU-0	7320	FR	FRANCE
RRS-7	7514	US	UNITED STATES
RSCH-4	8374	RU	RUSSIAN FEDERATION
SAPPORO-0	7330	JP	JAPAN
SEATTLE-0	8245	US	UNITED STATES
SG-1	7344	DE	GERMANY
SH-0	7331	DE	GERMANY
SHAHDARA	6962	TJ	TAJIKISTAN
SI-0	7337	DE	GERMANY
SP-0	7343	DE	GERMANY
SQ-1	6966	UK	UNITED KINGDOM
ST-0	8387	SE	SWEDEN
STE-3	2290	US	UNITED STATES
STW-0	8388	RU	RUSSIAN FEDERATION
TA-0	8389	CZ	CZECH REPUBLIC
TE-0	7352	FI	FINLAND
TSCHA-1	7372	AT	AUSTRIA
TSU-1	6972	JP	JAPAN
TU-1	7376	IT	ITALY
UKNW06-059	5380	UK	UNITED KINGDOM
ULL2-3	6973	SE	SWEDEN
WA-1	6978	PL	POLAND
WC-1	7404	DE	GERMANY
WEI-0	6979	CH	SWITZERLAND
WIL-1	100000	LT	LITHUANIA
WS-2	6981	RU	RUSSIAN FEDERATION
ZDR-1	6984	CZ	CZECH REPUBLIC
