# Supplementary material for: Combined Approach of GWAS and Phylogenetic Analyses to Identify New Candidate Genes That Participate in Arabidopsis thaliana Primary Root Development Using Cellular Measurements and Primary Root Length
Source: Plants (Basel). 2022 Nov 18;11(22):3162. doi: 10.3390/plants11223162 (PMC9697774; doi:10.3390/plants11223162)
Supplement: Supplementary file 1 [file plants-11-03162-s001.zip › Table S2. Summary_data.xlsx]

## Sheet: PR_1-12d
Table S2a PR growth in a time course of 2 to 12 days
Accession	ID	Mean_PR_length_2d	SD	Mean_PR_length_3d	SD	Mean_PR_length_4d	SD	Mean_PR_length_5d	SD	Mean_PR_length_6d	SD	Mean_PR_length_7d	SD	Mean_PR_length_8d	SD	Mean_PR_length_9d	SD	Mean_PR_length_10d	SD	Mean_PR_length_11d	SD	Mean_PR_length_12d	SD
AMEL-1	6990	0.227	0.0508352	0.514	0.0583705	0.7494	0.0651934	0.9698	0.0651934	1.2358	0.111548	1.7398	0.0749249	2.1363	0.116407	2.6396	0.0870418	3.0148	0.163442	3.3448	0.142951	3.669	0.205037
AN-1	6898	0.2237	0.0260173	0.5221	0.0629364	0.8797	0.103763	1.4308	0.103763	1.7431	0.170827	2.6054	0.243551	3.209	0.277192	4.3236	0.425597	5.7079	0.331853	6.9442	0.296679	8.3307	0.380651
ANN-1	6994	0.235	0.0355059	0.4653	0.0539445	0.782	0.0777004	0.9443	0.0777004	1.1049	0.119693	1.5331	0.187986	1.9486	0.15583	2.4946	0.295434	4.0634	0.221572	5.0065	0.276825	6.0974	0.361276
BA1-2	8256	0.1807	0.0328128	0.3911	0.0482964	0.6465	0.0633972	1.0289	0.0633972	1.3103	0.125655	1.5666	0.244827	2.267	0.167639	2.8289	0.18288	3.354	0.181616	3.9323	0.249831	4.3557	0.270853
BA4-1	8258	0.2175	0.0387936	0.4498	0.0438933	0.8515	0.108296	1.5548	0.108296	1.8751	0.220394	2.2593	0.228698	3.023	0.238718	3.7728	0.249762	4.7116	0.176288	5.6839	0.171659	6.8214	0.374372
BA5-1	8259	0.151	0.0267499	0.4861	0.0671242	1.026	0.117553	1.5235	0.117553	1.833	0.152007	2.5088	0.142653	3.2395	0.227984	3.9579	0.246562	4.8929	0.338141	5.9608	0.373129	7.1818	0.530095
BAA-1	7002	0.1743	0.0294054	0.3281	0.0687386	0.5628	0.0627514	0.8868	0.0627514	1.2733	0.198114	1.7905	0.237857	2.3502	0.277117	2.8861	0.258219	3.4374	0.270006	4.0406	0.280139	4.7651	0.281036
BAY-0	6899	0.1204	0.0311313	0.3412	0.0435247	0.5812	0.0385575	0.8697	0.0385575	1.1453	0.124584	1.5405	0.140334	1.9801	0.174612	2.611	0.286117	3.4468	0.293286	4.2184	0.511029	4.8448	0.555003
BLA-1	7015	0.1925	0.0361056	0.5382	0.0651695	0.9026	0.104721	1.3387	0.104721	1.8807	0.176232	2.4828	0.213515	3.0753	0.207953	3.9109	0.193563	4.8546	0.0953324	5.8345	0.280241	6.6534	0.38683
BOOT-1	7026	0.2946	0.0530392	0.5784	0.0579179	1.0037	0.0490112	1.5101	0.0490112	1.8344	0.0935856	2.5026	0.116012	3.1116	0.170914	3.839	0.182975	4.6516	0.261525	5.5923	0.273001	6.6092	0.373887
BS-1	8270	0.201	0.0334797	0.4246	0.0540272	0.7103	0.0472821	0.9856	0.0472821	1.2744	0.203967	1.7487	0.260416	2.4905	0.337717	3.0837	0.548516	4.1515	0.38421	5.5118	0.295633	6.8874	0.303144
BS-2	7004	0.2562	0.0593835	0.657	0.0845813	1.0661	0.144652	1.6099	0.144652	2.3385	0.132249	3.022	0.256813	3.7287	0.250187	4.7592	0.269323	5.8855	0.342985	7.2263	0.405812	8.511	0.556581
BSCH-2	7032	0.1696	0.0343	0.3782	0.0720784	0.5782	0.0675182	0.9564	0.0675182	1.2827	0.196986	1.894	0.176345	2.4703	0.206242	3.033	0.286315	3.6555	0.360704	4.2992	0.333228	5.0522	0.384233
BU-2	ND	0.0866	0.0243913	0.2347	0.0585947	0.5367	0.0808576	0.8372	0.0808576	1.1903	0.189238	1.749	0.238147	2.3592	0.22055	3.3606	0.231639	4.2965	0.368098	5.4404	0.39791	6.9054	0.365228
BUR-0	5719	0.2352	0.0338651	0.472	0.0575461	0.9065	0.138152	1.4616	0.138152	2.0709	0.287903	2.7373	0.225051	3.6946	0.347025	4.5833	0.468548	5.5517	0.507394	6.6677	0.536163	7.9402	0.784248
C24	6906	0.1626	0.0347761	0.3455	0.0394722	0.5947	0.090934	0.9471	0.090934	1.126	0.1048	1.586	0.139809	2.0574	0.150476	2.496	0.226288	3.1381	0.347473	3.8393	0.413894	4.7821	0.475431
CHAT-1	7071	0.2922	0.0377383	0.4149	0.0454788	0.7002	0.0780752	1.0992	0.0780752	1.3398	0.190567	1.6956	0.234875	2.2098	0.239589	2.7095	0.306447	3.3569	0.336039	4.1013	0.360267	4.6389	0.448735
CHI-1	7073	0.1672	0.0274704	0.4407	0.0672492	0.8129	0.116307	1.1179	0.116307	1.214	0.126493	1.5898	0.179157	2.2299	0.306081	2.9618	0.285018	3.6708	0.326013	4.6615	0.388372	5.5549	0.377815
CIBC-5	6730	0.1751	0.018187	0.4583	0.0368783	0.8928	0.0901851	1.1797	0.0901851	1.4755	0.12938	1.9995	0.167145	2.6141	0.260183	3.3764	0.317597	4.0927	0.33122	4.6428	0.368023	5.4294	0.424216
COL-0	6909	0.1595	0.0284107	0.4631	0.0829303	0.8303	0.0833939	1.5799	0.0833939	1.8427	0.152665	2.5477	0.189806	3.3636	0.196829	4.2938	0.243168	5.2867	0.327971	6.2666	0.449515	7.2548	0.508451
CRL-1	5731	0.4263	0.0682122	0.8835	0.0623275	1.3099	0.18614	2.175	0.18614	2.6097	0.212891	3.4542	0.29227	4.1934	0.330434	5.2267	0.341169	6.4682	0.61188	7.7131	0.695109	9.1902	0.639636
CT-1	6910	0.2073	0.0295411	0.4093	0.0444623	0.6366	0.0802405	0.9361	0.0802405	1.5784	0.131563	2.2267	0.195298	2.897	0.171274	3.6497	0.310814	4.2849	0.271166	5.1973	0.383422	6.0892	0.516661
CVI-0	6911	0.261	0.0487556	0.5704	0.0751816	0.8602	0.137847	1.4151	0.137847	1.6956	0.121608	2.16	0.255421	2.5922	0.216222	3.029	0.332684	3.7301	0.288444	4.4081	0.513438	5.3506	0.600172
DI-1	7098	0.2076	0.0350878	0.378	0.074683	0.7709	0.078435	1.0786	0.078435	1.3514	0.147451	1.9362	0.132604	2.5038	0.203153	3.0653	0.26669	3.5465	0.216319	4.0511	0.186832	4.6189	0.157117
DO-0	7102	0.1556	0.0343453	0.3664	0.0582813	0.6663	0.0807485	0.9341	0.0807485	1.5887	0.143877	2.1044	0.108532	2.635	0.163537	3.3075	0.167335	4.1186	0.192468	4.8332	0.198513	5.6617	0.231121
DRAII-1	8284	0.2264	0.0557239	0.4815	0.0531021	0.7501	0.0856816	1.2373	0.0856816	1.5032	0.129833	2.0238	0.224998	2.6612	0.192847	3.3624	0.245097	4.0881	0.240648	5.0269	0.315179	5.9485	0.347597
EDI-0	7111	0.1951	0.040728	0.4356	0.0456051	0.7335	0.0888583	1.1367	0.0888583	1.3438	0.214643	1.75	0.22412	2.1672	0.198669	2.8777	0.256917	3.6106	0.303809	4.5841	0.336603	5.5875	0.41564
EDI-8	9305	0.2247	0.027439	0.469	0.0575287	0.853	0.101012	1.0716	0.101012	1.4107	0.214102	1.9727	0.337684	2.6787	0.429384	3.5453	0.429163	4.3191	0.485675	5.3006	0.637859	6.3768	0.654787
EDINBURGH-5	9302	0.2046	0.0376687	0.4889	0.0375128	0.8199	0.0919217	1.2254	0.0919217	1.4221	0.102257	1.9219	0.236121	2.4304	0.312627	3.1646	0.281449	3.9676	0.291036	4.7599	0.280331	5.6841	0.267652
EP-0	7123	0.1845	0.0303727	0.5298	0.0705294	0.9785	0.112772	1.3276	0.112772	1.4915	0.141803	1.9672	0.196815	2.5058	0.288924	3.2559	0.276586	4.1957	0.319083	5.3737	0.293782	6.5473	0.343897
EST-1	6916	0.1808	0.0374338	0.3151	0.0297114	0.6166	0.137812	0.999	0.137812	1.4305	0.251198	1.9854	0.275027	2.7873	0.314857	3.5419	0.341788	4.4379	0.49443	5.4772	0.66688	6.468	0.740671
GA-0	6919	0.1168	0.0298582	0.2081	0.035407	0.4026	0.0915363	0.6253	0.0915363	1.2716	0.372538	1.6669	0.486579	2.1752	0.505896	2.8395	0.511481	3.6169	0.547334	4.4389	0.53278	5.4364	0.683299
GD-1	8296	0.1803	0.0457895	0.3459	0.0754077	0.5817	0.114373	0.921	0.114373	1.1537	0.206512	1.491	0.226961	1.9324	0.320892	2.2334	0.357671	2.596	0.358962	2.8657	0.390218	3.1416	0.440607
GEL-1	7143	0.2035	0.0295005	0.5127	0.0481457	0.8611	0.110378	1.4042	0.110378	1.8947	0.116568	2.5024	0.184401	3.0921	0.132135	4.0005	0.180682	4.8755	0.263999	5.6798	0.362841	6.7967	0.451919
GIE-0	7147	0.1796	0.0673617	0.3073	0.0416575	0.6301	0.125124	0.9996	0.125124	1.2886	0.18695	1.742	0.17619	2.2501	0.192887	2.807	0.187313	3.408	0.226534	3.9933	0.278521	4.5401	0.356184
GOT-7	6921	0.2717	0.0785621	0.4629	0.0425844	0.6529	0.0589068	1.0887	0.0589068	1.5279	0.232938	1.8195	0.201077	2.3644	0.248556	3.0046	0.297409	3.9086	0.433859	4.8454	0.386029	5.8368	0.41564
GR-1	8300	0.1752	0.0465637	0.3578	0.067333	0.7082	0.0721096	1.1013	0.0721096	1.7048	0.119346	2.3697	0.181156	3.2356	0.139443	3.9486	0.230219	4.9421	0.228925	5.8624	0.396658	6.9446	0.57806
GU-0	6922	0.2048	0.0442588	0.4586	0.0665486	0.7058	0.109942	1.0566	0.109942	1.2402	0.202936	1.7844	0.178885	2.2911	0.161243	3.1012	0.271196	4.0838	0.291756	5.2002	0.330853	6.2231	0.454188
HA-0	7163	0.2215	0.0412371	0.4912	0.0462188	0.7796	0.104296	1.1398	0.104296	1.5819	0.126215	2.1676	0.179244	2.8128	0.25173	3.5829	0.316682	4.3135	0.30995	5.2797	0.483141	6.0801	0.632322
HEY-1	7166	0.1656	0.0317777	0.3922	0.0314989	0.8149	0.0765111	1.2608	0.0765111	1.6909	0.243941	2.3449	0.308829	2.9652	0.349066	3.9162	0.323749	4.8218	0.528185	6.0599	0.59288	7.2025	0.59166
HI-0	8304	0.139	0.020445	0.3538	0.0547374	0.7697	0.0978182	1.2108	0.0978182	1.474	0.144696	2.0096	0.201013	2.433	0.272561	2.8168	0.246692	3.4065	0.397896	3.926	0.541815	4.665	0.634104
HIL-1	5745	0.206	0.030485	0.4451	0.0444583	0.7422	0.0884288	1.1471	0.0884288	1.4274	0.21263	1.8745	0.181768	2.4518	0.316557	3.0965	0.284416	3.8713	0.246701	4.5827	0.198091	5.4324	0.553687
HS-0	8310	0.2478	0.0492066	0.4805	0.0906302	0.8141	0.05767	1.2735	0.05767	1.725	0.213585	2.4307	0.207558	3.2215	0.301995	4.3653	0.254022	5.5636	0.326787	6.8389	0.516822	8.3742	0.601201
HSM	8236	0.2276	0.0329316	0.6245	0.065928	1.0811	0.114798	1.7844	0.114798	2.1278	0.180926	2.8424	0.24358	3.4008	0.207051	4.354	0.24149	5.2593	0.332722	6.0926	0.286617	6.9933	0.46831
IS-1	7176	0.2508	0.0434071	0.4089	0.0281364	0.7111	0.0905284	1.1975	0.0905284	1.6831	0.238858	2.4146	0.389937	3.2291	0.457027	3.9539	0.628534	4.446	0.732142	4.7471	0.737897	5.3486	0.898373
JM-0	8313	0.2337	0.0562239	0.4497	0.0739189	0.8616	0.131802	1.3519	0.131802	1.9977	0.285798	2.7858	0.319064	3.6939	0.359748	4.7322	0.462524	5.7955	0.433791	6.7149	0.668067	7.7659	0.800112
JM-1	7178	0.1558	0.0192919	0.3205	0.027204	0.6008	0.0887837	1.1369	0.0887837	1.3064	0.166198	1.923	0.154787	2.5229	0.194292	3.1866	0.176779	3.8335	0.397437	4.4923	0.368044	5.3015	0.753769
KA-0	8314	0.2323	0.0477425	0.6349	0.0675153	1.1353	0.097645	1.8161	0.097645	2.4937	0.276304	3.2613	0.33053	4.2245	0.434599	5.509	0.50137	6.6573	0.493572	7.8636	0.500016	9.4433	0.317888
KAS-2	8424	0	0	0.1754	0.0537074	0.5512	0.100439	0.9524	0.100439	1.4216	0.232521	1.9082	0.28328	2.4969	0.323066	2.9708	0.389392	3.6819	0.329223	4.7147	0.318854	5.5638	0.348218
KELSTERBACH-4	8420	0.2183	0.0530954	0.5178	0.0532579	0.8169	0.13083	1.279	0.13083	1.7707	0.275192	2.6789	0.324814	3.3823	0.315347	4.283	0.293497	5.5072	0.497098	6.6693	0.492091	8.1463	0.629477
KIN-0	6926	0.141	0.0210291	0.5011	0.0908936	0.9829	0.113544	1.5227	0.113544	1.7508	0.174505	2.4048	0.228909	3.071	0.206224	3.751	0.254872	4.5817	0.345364	5.3019	0.24199	6.2811	0.309162
KONDARA	6929	0.25	0.0276325	0.6482	0.0813863	1.0579	0.0921542	1.6108	0.0921542	1.8869	0.134294	2.5275	0.104598	3.105	0.155247	4.0068	0.212907	5.0627	0.263547	6.0023	0.344655	7.0233	0.338112
KR-0	7201	0.1425	0.0371162	0.3624	0.0601982	0.5799	0.117164	0.954	0.117164	1.1991	0.128248	1.7951	0.176246	2.6452	0.247839	3.5792	0.309928	4.6333	0.493507	5.9768	0.676288	7.4827	0.812905
KYL-1	5751	0.2358	0.0291769	0.4328	0.0611661	0.6959	0.0689457	0.9308	0.0689457	1.2277	0.195385	1.5653	0.307508	1.962	0.33623	2.5696	0.38901	3.133	0.440137	3.7432	0.556469	4.6905	0.48568
LAC-3	94	0.2272	0.0354802	0.4835	0.0532024	0.8549	0.0919015	1.0941	0.0919015	1.3874	0.136208	1.8779	0.187223	2.433	0.269014	3.2147	0.250608	3.918	0.326421	4.6758	0.312679	5.3787	0.511718
LDV-58	149	0.0937	0.0276367	0.2339	0.0381152	0.5316	0.0823135	0.7952	0.0823135	1.0655	0.302695	1.499	0.315134	2.0572	0.309388	2.7799	0.385733	3.6081	0.365507	4.6861	0.382802	5.8207	0.349487
LER-1	6932	0.2392	0.0323618	0.5339	0.0990089	0.9461	0.110199	1.5431	0.110199	1.7527	0.161539	2.4513	0.22089	3.0261	0.234688	3.7719	0.255803	4.6959	0.374565	5.3168	0.504403	6.0147	0.626511
LI-3	7224	0.2277	0.0250024	0.4555	0.0417326	0.7443	0.0885516	1.2446	0.0885516	1.6296	0.269536	2.4002	0.302244	3.1472	0.389856	4.2471	0.519653	5.3584	0.730449	6.6604	0.774099	7.8802	0.765469
LI-7	7231	0.2258	0.041859	0.5317	0.0622897	0.858	0.166939	1.1414	0.166939	1.307	0.169204	1.8032	0.298601	2.5244	0.32241	3.2299	0.310121	4.1404	0.509871	4.8626	0.552338	5.9725	0.899838
LO-2	7242	0.153	0.0517021	0.4065	0.0545553	0.7668	0.0766044	1.1223	0.0766044	1.4216	0.212835	2.0083	0.277012	2.5469	0.350108	3.1919	0.467218	3.88	0.468075	4.4917	0.457391	5.2254	0.565262
LOV-1	6043	0.1706	0.0207	0.4421	0.0430489	0.9163	0.166964	1.2573	0.166964	1.6329	0.369139	2.415	0.352576	3.259	0.403035	4.254	0.439838	5.5666	0.518173	6.9589	0.488535	8.5082	0.577444
LOV-5	6046	0.1549	0.0217176	0.4512	0.0249257	0.7829	0.0934927	1.17	0.0934927	1.3936	0.122809	2.0078	0.212535	2.7686	0.20577	3.6684	0.211881	4.5657	0.213937	5.4829	0.297954	6.5487	0.334558
LP2-2	7520	0.1979	0.0383564	0.4776	0.0338401	0.9111	0.0750182	1.2448	0.0750182	1.5757	0.222636	2.068	0.161671	2.5737	0.178332	3.2954	0.197224	3.7743	0.20083	4.529	0.423117	5.1537	0.593614
LS-0	8312	0.1712	0.0215293	0.3384	0.0519406	0.555	0.0880344	0.7295	0.0880344	0.8669	0.178378	1.3713	0.236328	1.9632	0.236059	2.8196	0.27161	3.6025	0.391963	4.6313	0.535439	5.7062	0.647927
LU-1	8334	0.1374	0.0328133	0.3058	0.0760231	0.5498	0.0680203	0.8381	0.0680203	1.02	0.151373	1.2432	0.120713	1.6752	0.192197	2.0241	0.302996	2.3513	0.351987	2.7785	0.417769	3.1594	0.608196
MA-2	7246	0.1665	0.030974	0.3519	0.0521183	0.5778	0.0956036	0.8926	0.0956036	1.2198	0.12369	1.6099	0.128794	2.1339	0.197568	2.9079	0.248465	3.7058	0.265248	4.7374	0.349943	5.8911	0.612551
MH-0	7255	0.2248	0.0382675	0.4796	0.0469898	0.862	0.138571	1.2437	0.138571	1.7411	0.192113	2.4325	0.166055	3.2685	0.0996117	4.2262	0.261679	5.026	0.278405	5.9035	0.425105	7.0815	0.532074
MIB-60	204	0.1649	0.0221081	0.3998	0.0624727	0.7683	0.091226	1.1432	0.091226	1.4829	0.133188	2.028	0.158312	2.6916	0.180109	3.4639	0.205849	4.2831	0.298939	5.2081	0.222101	6.0281	0.28111
MIB-86	224	0.2245	0.0242911	0.5533	0.0741875	1.0432	0.125495	1.6166	0.125495	1.8919	0.163005	2.6007	0.236617	3.388	0.227419	4.2276	0.336126	5.1732	0.339007	6.0837	0.346175	7.1624	0.360263
MIR-0	8337	0.1731	0.0287536	0.3921	0.0443257	0.7156	0.0924795	0.9663	0.0924795	1.3495	0.20248	1.7924	0.328751	2.3155	0.378775	2.9677	0.309342	3.4909	0.361499	4.1865	0.459737	5.1213	0.423217
MNF-POT-48	1859	0.1845	0.0475096	0.3619	0.0884803	0.6097	0.127417	0.9675	0.127417	1.2067	0.241758	1.6393	0.231857	2.053	0.33149	2.7776	0.388569	3.4203	0.429711	4.1942	0.455869	5.0445	0.55557
MNZ-0	7244	0.2692	0.0565328	0.5028	0.0697676	0.9698	0.146214	1.5172	0.146214	1.9023	0.203371	2.5188	0.258467	3.4594	0.23878	4.3271	0.23563	5.4466	0.26275	6.7767	0.504615	7.9577	0.799526
MOG-37	242	0.216	0.0281267	0.554	0.0478818	0.9402	0.114685	1.3542	0.114685	1.5818	0.165093	2.0742	0.183704	2.7052	0.209976	3.3982	0.264963	4.4716	0.26726	5.4969	0.241902	6.7352	0.27401
MRK-0	6937	0.207	0.0497147	0.4492	0.0724029	0.6784	0.140138	1.2028	0.140138	1.7116	0.177114	2.3097	0.067513	2.8901	0.171193	3.753	0.192078	4.8717	0.281505	6.0632	0.362747	7.4121	0.723293
MS-0	6938	0.1675	0.0407301	0.4269	0.059674	0.7623	0.0738223	1.0402	0.0738223	1.5787	0.312983	2.1453	0.346672	2.7507	0.457649	3.2906	0.521516	3.8203	0.475285	4.3454	0.381753	5.1972	0.475913
MT-0	6939	0.166	0.0213802	0.3379	0.0436003	0.6286	0.0524171	0.892	0.0524171	1.0895	0.235117	1.6365	0.263308	2.2571	0.265455	2.9921	0.41858	3.5443	0.553504	4.1008	0.684397	4.8498	0.669904
NA-1	8343	0.2036	0.0467266	0.3917	0.0821909	0.7654	0.10648	1.244	0.10648	1.5774	0.220997	2.0408	0.321682	2.8301	0.310439	3.4993	0.462061	4.282	0.503021	5.3675	0.723872	6.4059	0.95222
ND-1	6942	0.2384	0.0436913	0.5531	0.0910439	1.0352	0.108624	1.5022	0.108624	2.0684	0.183132	2.5757	0.208061	3.4017	0.301915	4.1825	0.367279	5.1049	0.571143	5.9369	0.644589	6.6184	0.8068
NO-0	7275	0.1719	0.040616	0.3797	0.0540042	0.6953	0.131234	1.0711	0.131234	1.5411	0.148331	1.9957	0.247552	2.6203	0.290776	3.3314	0.210576	3.8737	0.268591	4.4319	0.393018	5.0549	0.553146
NW-0	8348	0.2011	0.0434165	0.451	0.0426797	0.7881	0.0709103	1.2214	0.0709103	1.6506	0.198616	2.1573	0.202302	2.8544	0.275779	3.6659	0.286972	4.5687	0.4056	5.5246	0.403453	6.5761	0.467836
NW-4	7262	0.1827	0.0366577	0.4411	0.0459213	0.7874	0.0871926	1.1319	0.0871926	1.2826	0.0970592	1.761	0.214645	2.1826	0.298365	2.8205	0.390344	3.6532	0.494065	4.9313	0.621854	5.9279	0.904497
OB-0	7276	0.188	0.0331662	0.387	0.0539321	0.7043	0.110769	1.3326	0.110769	1.5855	0.196823	2.2771	0.223345	2.8972	0.332335	3.7538	0.360434	4.5278	0.533051	5.6515	0.804182	6.912	1.07823
OLD-1	7280	0.1252	0.036432	0.3554	0.0524875	0.6721	0.0658383	1.1147	0.0658383	1.414	0.133943	1.8925	0.163995	2.6182	0.143323	3.3689	0.127965	4.419	0.255523	5.6072	0.148224	6.5551	0.215517
OR-0	7282	0.2047	0.0469398	0.4379	0.0804494	0.7466	0.120445	1.117	0.120445	2.096	0.164765	2.7689	0.185234	3.6841	0.261755	4.7167	0.280742	5.4208	0.548011	6.1095	0.735423	6.9545	0.888921
OVE-0	7287	0.1943	0.0215873	0.4726	0.044585	0.8795	0.0891815	1.257	0.0891815	1.61	0.219888	2.2028	0.315721	2.9093	0.358541	3.6969	0.29089	4.4483	0.408035	5.2889	0.345548	6.3154	0.545882
PER-1	8354	0.2316	0.0262898	0.488	0.0487123	0.7921	0.0496293	1.1952	0.0496293	1.4561	0.138338	1.9382	0.178401	2.6946	0.19008	3.4661	0.162352	4.3241	0.22707	5.1938	0.362834	6.1876	0.548317
PF-0	7297	0.2129	0.0284075	0.4262	0.0601088	0.7124	0.0704952	1.0477	0.0704952	1.3518	0.176419	1.9202	0.292167	2.5053	0.34281	3.0219	0.356486	3.4742	0.486523	4.1223	0.379452	4.5221	0.498907
PHW-2	8243	0.1209	0.0238768	0.2675	0.0379364	0.6422	0.115123	0.9784	0.115123	1.5934	0.118212	2.2463	0.192391	2.8757	0.322158	3.6528	0.356936	4.7555	0.486433	5.5875	0.430771	6.8411	0.416376
PLA-0	7300	0.2065	0.0736949	0.5316	0.0910777	0.886	0.107688	1.3316	0.107688	1.7409	0.165475	2.3123	0.275494	2.8257	0.181254	3.4084	0.218941	3.9201	0.217223	4.4974	0.246846	5.0814	0.272504
PN-0	7307	0.1642	0.0186595	0.4708	0.0426036	0.9379	0.143278	1.4685	0.143278	1.9281	0.291865	2.4557	0.256748	3.1473	0.368338	4.0364	0.359755	4.9525	0.366682	6.106	0.501706	7.0395	0.523975
PO-1	7309	0.1699	0.05628	0.3839	0.0380685	0.6687	0.138359	1.1083	0.138359	1.592	0.169937	2.2187	0.193859	2.827	0.215297	3.6005	0.234852	4.4412	0.284255	5.4321	0.325975	6.3793	0.414438
POG-0	7306	0.5198	0.0617788	0.8932	0.0871229	1.4418	0.300827	2.0019	0.300827	2.3258	0.34481	3.2545	0.306683	4.0704	0.345716	5.293	0.423438	6.4527	0.538548	7.6237	0.613824	9.1245	0.660742
PRO-0	8213	0.2248	0.0437157	0.4597	0.0481296	0.6922	0.0874772	1.1216	0.0874772	1.394	0.134626	1.8745	0.13088	2.3192	0.16688	2.7554	0.285455	3.2058	0.322694	3.6669	0.494733	4.252	0.584231
PU2-7	6956	0.201	0.0409525	0.5051	0.0509018	0.8265	0.0964509	1.1441	0.0964509	1.5031	0.232849	2.0507	0.227952	2.7549	0.167967	3.5326	0.219462	4.4501	0.232541	5.4063	0.342555	6.6448	0.446162
RA-0	6958	0.5037	0.0791441	1.0026	0.0851433	1.6832	0.148379	2.3547	0.148379	2.6729	0.290674	3.4739	0.398377	4.5334	0.552606	5.591	0.670533	6.9498	0.961478	8.1968	0.902846	9.5157	0.928288
RD-0	8366	0.1157	0.0304012	0.3028	0.0413758	0.7839	0.0429475	1.2926	0.0429475	1.5185	0.144681	1.9824	0.150282	2.7027	0.236599	3.4896	0.169799	4.3067	0.268021	5.2049	0.334582	6.2926	0.314687
REN-1	6959	0.2456	0.0647889	0.4849	0.0842937	0.7419	0.0976345	1.1246	0.0976345	1.5938	0.174963	2.1058	0.150305	2.7246	0.191934	3.5957	0.244326	4.5264	0.199114	5.4872	0.3339	6.5017	0.437273
ROU-0	7320	0.1815	0.0417911	0.4578	0.0315306	0.8595	0.0801558	1.3485	0.0801558	1.6529	0.124964	2.1134	0.16008	2.7792	0.239061	3.4273	0.28517	4.2969	0.32336	5.0378	0.46183	5.9485	0.522838
RRS-7	7514	0.2084	0.0356408	0.4314	0.0882222	0.6996	0.106431	1.2826	0.106431	1.7626	0.342861	2.3895	0.314015	3.0911	0.419333	3.8278	0.44662	4.9668	0.447734	6.0551	0.561365	7.435	0.585173
RSCH-4	8374	0.189	0.0548331	0.4482	0.0416995	0.6938	0.0699997	1.0728	0.0699997	1.3121	0.157722	1.7212	0.118757	2.2935	0.16833	3.0217	0.134453	3.9029	0.236273	5.0336	0.371185	6.1095	0.482208
SAPPORO-0	7330	0.1154	0.0244413	0.3549	0.0251239	0.6105	0.112515	0.9838	0.112515	1.1259	0.170589	1.6153	0.232424	2.2077	0.245466	2.9582	0.248108	3.6716	0.411458	4.2935	0.521042	5.2543	0.670791
SEATTLE-0	8245	0.1892	0.0269436	0.4153	0.050414	0.815	0.0550766	1.1339	0.0550766	1.3056	0.157614	1.8591	0.213687	2.4255	0.212937	3.1958	0.230838	3.8955	0.296131	4.8616	0.303004	5.6582	0.295346
SG-1	7344	0.2184	0.0412262	0.5227	0.0556578	0.8608	0.165803	1.5568	0.165803	2.031	0.171932	2.8492	0.30133	3.6544	0.293254	4.7576	0.321131	5.8153	0.396243	7.1867	0.414205	8.7245	0.360098
SH-0	7331	0.1907	0.0293297	0.369	0.0498442	0.5888	0.0658297	0.771	0.0658297	0.9981	0.173023	1.3975	0.215715	2.0479	0.316344	3.0194	0.352278	4.1379	0.639428	4.9423	0.484726	6.0802	0.43984
SHAHDARA	6962	0.2112	0.0281772	0.6314	0.0499382	0.9412	0.105407	1.3864	0.105407	1.5743	0.185792	2.1461	0.188481	2.7787	0.143052	3.6667	0.209399	4.6807	0.345253	5.5706	0.253767	6.7893	0.284817
SI-0	7337	0.1466	0.0286868	0.3599	0.0443683	0.6994	0.061947	1.1239	0.061947	1.3641	0.132995	1.9746	0.177583	2.616	0.170205	3.5004	0.202914	4.3377	0.239616	5.2991	0.311229	6.2974	0.305147
SP-0	7343	0.1453	0.0308259	0.3651	0.0462204	0.8042	0.105495	1.1479	0.105495	1.521	0.145746	2.038	0.145472	2.7548	0.215815	3.4447	0.21706	4.1389	0.215574	4.9607	0.338254	5.7875	0.561916
SQ-1	6966	0.157	0.0431148	0.401	0.070065	0.7218	0.0800058	0.9956	0.0800058	1.1925	0.191568	1.6891	0.182341	2.065	0.154486	2.6726	0.270293	3.3538	0.270677	4.1529	0.283019	4.8483	0.23789
ST-0	8387	0.1391	0.0351108	0.3385	0.0550237	0.6574	0.0827017	1.1217	0.0827017	1.3956	0.143721	2.0944	0.202924	2.8951	0.208678	3.9763	0.246402	5.0903	0.298056	6.1179	0.35178	7.3141	0.464829
STE-3	2290	0.1269	0.0313456	0.2991	0.0286257	0.7146	0.170525	1.1136	0.170525	1.3507	0.188708	1.937	0.319313	2.3976	0.193812	3.1126	0.221502	4.0715	0.309051	5.2295	0.424251	6.3098	0.505151
STW-0	8388	0.2018	0.0279396	0.4476	0.0795169	0.6625	0.0770371	1.0194	0.0770371	1.3738	0.174488	1.9067	0.164355	2.4148	0.224467	3.1643	0.248013	4.0822	0.298602	4.9009	0.260069	5.8803	0.391379
TA-0	7349	0.169	0.0582199	0.4133	0.0807576	0.7159	0.0986232	1.0289	0.0986232	1.7877	0.22462	2.5161	0.283572	3.1768	0.245584	3.9105	0.467779	4.7619	0.643599	5.5521	0.921482	6.1235	0.952207
TE-0	7352	0.0497	0.0125791	0.1623	0.0301958	0.3674	0.0936245	0.671	0.0936245	0.8631	0.143796	1.2375	0.123907	1.7179	0.198788	2.3694	0.251415	2.9653	0.330335	3.7215	0.366588	4.6526	0.50337
TSCHA-1	7372	0.2583	0.0621093	0.5414	0.0766423	0.8603	0.130288	1.3677	0.130288	1.6751	0.186959	2.3493	0.212662	2.7753	0.30212	3.5664	0.427363	4.2646	0.518327	4.9859	0.646171	5.7756	0.84257
TSU-1	6972	0.2085	0.0347155	0.4906	0.0630594	1.0468	0.172664	1.5576	0.172664	1.8673	0.181648	2.4331	0.144612	2.9557	0.228837	3.7078	0.439385	4.7297	0.391433	5.5362	0.744064	6.7051	0.876703
TU-1	7376	0.1347	0.0426381	0.3254	0.0644122	0.6437	0.0937102	1.1454	0.0937102	1.5597	0.237187	2.0692	0.206917	2.6733	0.166608	3.3547	0.278956	4.053	0.277187	4.8252	0.300257	5.8569	0.386957
UKNW06-059	5380	0.2455	0.0510539	0.4788	0.0874589	0.8585	0.122201	1.1637	0.122201	1.425	0.24263	1.959	0.304284	2.977	0.349166	3.8216	0.298567	4.9568	0.218366	6.148	0.236113	7.3016	0.177158
ULL2-3	6973	0.1942	0.0339143	0.4475	0.0455467	0.7463	0.0799969	1.1352	0.0799969	1.4586	0.166764	1.9968	0.255951	2.6095	0.2555	3.2759	0.344143	4.0003	0.324563	4.5972	0.561978	5.4317	0.713402
WA-1	6978	0.1683	0.0184092	0.4558	0.0471942	0.8584	0.0806994	1.3102	0.0806994	1.6689	0.108325	2.3556	0.14213	3.0868	0.204008	4.0885	0.216349	5.1093	0.32224	6.1006	0.29617	7.0468	0.460626
WC-1	7404	0.2379	0.0376193	0.4532	0.0667713	0.8401	0.10394	1.1862	0.10394	1.4492	0.188626	1.9587	0.203313	2.7985	0.236689	3.5935	0.260987	4.6952	0.277751	5.6082	0.298741	6.551	0.364851
WEI-0	6979	0.2799	0.0585993	0.6296	0.0459908	1.0712	0.180136	1.1978	0.180136	1.5183	0.341134	1.9592	0.394722	2.603	0.382949	3.2659	0.359454	4.2219	0.339665	5.1042	0.366245	6.2723	0.442772
WIL-1	100000	0.2352	0.0494993	0.5399	0.0993707	0.9759	0.22744	1.4725	0.22744	1.7808	0.229504	2.2212	0.48924	3.5442	0.356225	4.5176	0.260328	5.4843	0.321774	6.5562	0.515223	7.781	0.504085
WS-2	6981	0.2235	0.0400645	0.3792	0.0697309	0.6882	0.101694	1.0609	0.101694	1.3757	0.145897	1.9279	0.240418	2.5667	0.236156	3.2729	0.231436	3.9651	0.447306	4.5751	0.639766	5.5324	0.746932
ZDR-1	6984	0.1223	0.0164928	0.3091	0.044618	0.5642	0.0613229	0.8635	0.0613229	1.2768	0.232125	1.7335	0.308726	2.1894	0.278824	2.9109	0.399453	3.4076	0.503094	4.2202	0.474969	4.9039	0.646948

## Sheet: Growth_rate_12d
Table S2b Growth rate in a time course of 3 to 12 days
Accession	ID	GR_length_3d	SD	GR_length_4d	SD	GR_length_5d	SD	GR_length_6d	SD	GR_length_7d	SD	GR_length_8d	SD	GR_length_9d	SD	GR_length_10d	SD	GR_length_11d	SD	GR_length_12d	SD
AMEL-1	6990	0.287	0.0497684	0.2354	0.126451	0.2204	0.131038	0.266	0.135033	0.504	0.15616	0.3965	0.140504	0.5033	0.0714019	0.3752	0.113192	0.33	0.173389	0.3242	0.214129
AN-1	6898	0.2984	0.0797178	0.3576	0.0883569	0.5511	0.117436	0.3123	0.142113	0.8623	0.133051	0.6036	0.176521	1.1146	0.24268	1.3843	0.151182	1.2363	0.279292	1.3865	0.279134
ANN-1	6994	0.2303	0.0729871	0.3167	0.101926	0.1623	0.0627164	0.1606	0.112024	0.4282	0.147916	0.4155	0.133351	0.546	0.230902	1.5688	0.341832	0.9431	0.285401	1.0909	0.51057
BA1-2	8256	0.2104	0.060557	0.2554	0.0683995	0.3824	0.0751993	0.2814	0.163404	0.2563	0.170369	0.7004	0.284465	0.5619	0.103454	0.5251	0.170545	0.5783	0.185718	0.4234	0.106726
BA4-1	8258	0.2323	0.0565942	0.4017	0.0963513	0.7033	0.143084	0.3203	0.237312	0.3842	0.183917	0.7637	0.159744	0.7498	0.405108	0.9388	0.368413	0.9723	0.281893	1.1375	0.459934
BA5-1	8259	0.3351	0.0671308	0.5399	0.087993	0.4975	0.0622705	0.3095	0.145078	0.6758	0.106493	0.7307	0.142358	0.7184	0.133687	0.935	0.113247	1.0679	0.114825	1.221	0.179056
BAA-1	7002	0.1538	0.0716113	0.2347	0.0989243	0.324	0.0845301	0.3865	0.209216	0.5172	0.13445	0.5597	0.217656	0.5359	0.105388	0.5513	0.0964366	0.6032	0.09273	0.7245	0.338758
BAY-0	6899	0.2208	0.0605912	0.24	0.111714	0.2885	0.0980536	0.2756	0.112779	0.3952	0.142285	0.4396	0.14324	0.6309	0.191763	0.8358	0.175732	0.7716	0.3455	0.6264	0.136017
BLA-1	7015	0.3457	0.0851979	0.3644	0.0917693	0.4361	0.139581	0.542	0.184757	0.6021	0.172521	0.5925	0.100466	0.8356	0.0925361	0.9437	0.174209	0.9799	0.30526	0.8189	0.320184
BOOT-1	7026	0.2838	0.0737274	0.4253	0.0905441	0.5064	0.0944519	0.3243	0.100172	0.6682	0.141088	0.609	0.128023	0.7274	0.115863	0.8126	0.162128	0.9407	0.0828279	1.0169	0.144159
BS-1	8270	0.2236	0.0610341	0.2857	0.0761724	0.2753	0.0763647	0.2888	0.209635	0.4743	0.166359	0.7418	0.191071	0.5932	0.411074	1.0678	0.846342	1.3603	0.312447	1.3756	0.357034
BS-2	7004	0.4008	0.107332	0.4091	0.163545	0.5438	0.103539	0.7286	0.181839	0.6835	0.298656	0.7067	0.410099	1.0305	0.212334	1.1263	0.221325	1.3408	0.167142	1.2847	0.193172
BSCH-2	7032	0.2086	0.0553398	0.2	0.0441185	0.3782	0.0716873	0.3263	0.169467	0.6113	0.0705708	0.5763	0.0846602	0.5627	0.142098	0.6225	0.193873	0.6437	0.188608	0.753	0.288425
BU-2	ND	0.1481	0.054464	0.302	0.074741	0.3005	0.0909777	0.3531	0.181795	0.5587	0.107144	0.6102	0.142359	1.0014	0.120577	0.9359	0.20512	1.1439	0.108787	1.465	0.154929
BUR-0	5719	0.2368	0.0779085	0.4345	0.15552	0.5551	0.173618	0.6093	0.262804	0.6664	0.135792	0.9573	0.229963	0.8887	0.208418	0.9684	0.205688	1.116	0.279632	1.2725	0.969243
C24	6906	0.1829	0.0517783	0.2492	0.0627407	0.3524	0.107102	0.1789	0.103607	0.46	0.0878357	0.4714	0.0907808	0.4386	0.107322	0.6421	0.157593	0.7012	0.142652	0.9428	0.158644
CHAT-1	7071	0.1227	0.0726576	0.2853	0.0899605	0.399	0.0913467	0.2406	0.16647	0.3558	0.16429	0.5142	0.114268	0.4997	0.12123	0.6474	0.138953	0.7444	0.177786	0.5376	0.276942
CHI-1	7073	0.2735	0.0669465	0.3722	0.0896745	0.305	0.111564	0.0961	0.0621512	0.3758	0.172185	0.6401	0.183329	0.7319	0.116797	0.709	0.0899951	0.9907	0.0962105	0.8934	0.11739
CIBC-5	6730	0.2832	0.0315517	0.4345	0.0641166	0.2869	0.115308	0.2958	0.093891	0.524	0.116627	0.6146	0.147224	0.7623	0.191152	0.7163	0.112693	0.5501	0.140249	0.7866	0.217862
COL-0	6909	0.3036	0.0873285	0.3672	0.0863067	0.7496	0.132616	0.2628	0.150237	0.705	0.139373	0.8159	0.14341	0.9302	0.167242	0.9929	0.166832	0.9799	0.236429	0.9882	0.174514
CRL-1	5731	0.4572	0.0755407	0.4264	0.121631	0.8651	0.182139	0.4347	0.229033	0.8445	0.314574	0.7392	0.218119	1.0333	0.184966	1.2415	0.484287	1.2449	0.256447	1.4771	0.383462
CT-1	6910	0.202	0.0608897	0.2273	0.0809761	0.2995	0.126219	0.6423	0.15909	0.6483	0.158659	0.6703	0.0857231	0.7527	0.238841	0.6352	0.217136	0.9124	0.265282	0.8919	0.256743
CVI-0	6911	0.3094	0.101156	0.2898	0.0966641	0.5549	0.167125	0.2805	0.1722	0.4644	0.16134	0.4322	0.151639	0.4368	0.231018	0.7011	0.135021	0.678	0.392486	0.9425	0.275837
DI-1	7098	0.1704	0.0605919	0.3929	0.112537	0.3077	0.124176	0.2728	0.147826	0.5848	0.104173	0.5676	0.148932	0.5615	0.125782	0.4812	0.23897	0.5046	0.189077	0.5678	0.315027
DO-0	7102	0.2108	0.0498348	0.2999	0.0945709	0.2678	0.128418	0.6546	0.0960731	0.5157	0.0858811	0.5306	0.124046	0.6725	0.170276	0.8111	0.164616	0.7146	0.0919471	0.8285	0.121629
DRAII-1	8284	0.2551	0.0786108	0.2686	0.110827	0.4872	0.125957	0.2659	0.1565	0.5206	0.162953	0.6374	0.126642	0.7012	0.232078	0.7257	0.287336	0.9388	0.20643	0.9216	0.293571
EDI-0	7111	0.2405	0.06197	0.2979	0.0643004	0.4032	0.120402	0.2071	0.172695	0.4062	0.260983	0.4172	0.0867279	0.7105	0.142971	0.7329	0.172266	0.9735	0.155469	1.0034	0.232032
EDI-8	9305	0.2443	0.0444498	0.384	0.0832386	0.2186	0.127672	0.3391	0.250777	0.562	0.187612	0.706	0.156501	0.8666	0.310437	0.7738	0.336103	0.9815	0.174181	1.0762	0.540522
EDINBURGH-5	9302	0.2843	0.0629074	0.331	0.0603656	0.4055	0.0620882	0.1967	0.0937622	0.4998	0.162318	0.5085	0.132467	0.7342	0.111445	0.803	0.108961	0.7923	0.0575752	0.9242	0.0927036
EP-0	7123	0.3453	0.0628739	0.4487	0.122955	0.3491	0.159139	0.1639	0.115928	0.4757	0.164059	0.5386	0.16035	0.7501	0.182305	0.9398	0.299717	1.178	0.283998	1.1736	0.333759
EST-1	6916	0.1343	0.0588993	0.3015	0.0522563	0.3824	0.157892	0.4315	0.161409	0.5549	0.109401	0.8019	0.175439	0.7546	0.143286	0.896	0.224908	1.0393	0.219216	0.9908	0.157737
GA-0	6919	0.0913	0.0411988	0.1945	0.0792566	0.2227	0.083204	0.6463	0.430386	0.3953	0.139973	0.5083	0.117825	0.6643	0.191612	0.7774	0.115697	0.822	0.192117	0.9975	0.235601
GD-1	8296	0.1656	0.0955106	0.2358	0.0977557	0.3393	0.176666	0.2327	0.173832	0.3373	0.271904	0.4414	0.318129	0.301	0.104248	0.3626	0.114916	0.2697	0.215579	0.2759	0.166246
GEL-1	7143	0.3092	0.0569889	0.3484	0.0925265	0.5431	0.153062	0.4905	0.184975	0.6077	0.124538	0.5897	0.162891	0.9084	0.171756	0.875	0.134478	0.8043	0.335947	1.1169	0.356971
GIE-0	7147	0.1277	0.049688	0.3228	0.0568659	0.3695	0.124596	0.289	0.162338	0.4534	0.119889	0.5081	0.170615	0.5569	0.195047	0.601	0.166691	0.5853	0.151673	0.5468	0.111604
GOT-7	6921	0.1912	0.0927	0.19	0.0598721	0.4358	0.0715073	0.4392	0.231688	0.2916	0.0993738	0.5449	0.134767	0.6402	0.14694	0.904	0.297004	0.9368	0.229033	0.9914	0.282961
GR-1	8300	0.1826	0.0531731	0.3504	0.0928669	0.3931	0.0735579	0.6035	0.133929	0.6649	0.227528	0.8659	0.198656	0.713	0.195437	0.9935	0.141549	0.9203	0.359906	1.0822	0.6596
GU-0	6922	0.2538	0.0634049	0.2472	0.0566525	0.3508	0.0972646	0.1836	0.1623	0.5442	0.208764	0.5067	0.123447	0.8101	0.238303	0.9826	0.220018	1.1164	0.282813	1.0229	0.34733
HA-0	7163	0.2697	0.0649907	0.2884	0.0905897	0.3602	0.127773	0.4421	0.150231	0.5857	0.1897	0.6452	0.356918	0.7701	0.404419	0.7306	0.367111	0.9662	0.381418	0.8004	0.343933
HEY-1	7166	0.2266	0.0534378	0.4227	0.0810172	0.4459	0.0923501	0.4301	0.233554	0.654	0.334101	0.6203	0.381958	0.951	0.140608	0.9056	0.283557	1.2381	0.170357	1.1426	0.35189
HI-0	8304	0.2148	0.0567799	0.4159	0.0805487	0.4411	0.108738	0.2632	0.14677	0.5356	0.168799	0.4234	0.167732	0.3838	0.145977	0.5897	0.220317	0.5195	0.220919	0.739	0.138739
HIL-1	5745	0.2391	0.0607791	0.2971	0.0628922	0.4049	0.0646949	0.2803	0.167862	0.4471	0.0872435	0.5773	0.238169	0.6447	0.187612	0.7748	0.147672	0.7114	0.232932	0.8497	0.581713
HS-0	8310	0.2327	0.0783979	0.3336	0.125689	0.4594	0.101357	0.4515	0.238046	0.7057	0.172975	0.7908	0.402766	1.1438	0.440273	1.1983	0.158313	1.2753	0.536255	1.5353	0.123173
HSM	8236	0.3969	0.0677995	0.4566	0.122977	0.7033	0.132498	0.3434	0.243187	0.7146	0.224338	0.5584	0.155825	0.9532	0.194223	0.9053	0.241733	0.8333	0.284634	0.9007	0.382265
IS-1	7176	0.1581	0.0455569	0.3022	0.076226	0.4864	0.133114	0.4856	0.293301	0.7315	0.219857	0.8145	0.131634	0.7248	0.235098	0.4921	0.210987	0.3011	0.187008	0.6015	0.330461
JM-0	8313	0.216	0.0894204	0.4119	0.104942	0.4903	0.138814	0.6458	0.271021	0.7881	0.139744	0.9081	0.141232	1.0383	0.21277	1.0633	0.293711	0.9194	0.293679	1.051	0.255413
JM-1	7178	0.1647	0.0369806	0.2803	0.0552772	0.5361	0.0491335	0.1695	0.12393	0.6166	0.132509	0.5999	0.139338	0.6637	0.164077	0.6469	0.314361	0.6588	0.17109	0.8092	0.4338
KA-0	8314	0.4026	0.0697618	0.5004	0.0847915	0.6808	0.13318	0.6776	0.303453	0.7676	0.202776	0.9632	0.6265	1.2845	0.244666	1.1483	0.403654	1.2063	0.352288	1.5797	0.592907
KAS-2	8424	0.1754	0.0537074	0.3758	0.0604351	0.4012	0.10355	0.4692	0.263957	0.4866	0.159953	0.5887	0.0744492	0.4739	0.172588	0.7111	0.154241	1.0328	0.115403	0.8491	0.178031
KELSTERBACH-4	8420	0.2995	0.082453	0.2991	0.0977667	0.4621	0.127359	0.4917	0.26354	0.9082	0.172973	0.7034	0.218397	0.9007	0.327575	1.2242	0.46576	1.1621	0.203165	1.477	0.245721
KIN-0	6926	0.3601	0.0828418	0.4818	0.127308	0.5398	0.113944	0.2281	0.174836	0.654	0.170611	0.6662	0.15727	0.68	0.116464	0.8307	0.279028	0.7202	0.180511	0.9792	0.172593
KONDARA	6929	0.3982	0.0651422	0.4097	0.168903	0.5529	0.148526	0.2761	0.14113	0.6406	0.155354	0.5775	0.175514	0.9018	0.116538	1.0559	0.206165	0.9396	0.2358	1.021	0.247597
KR-0	7201	0.2199	0.0517997	0.2175	0.0714318	0.3741	0.152894	0.2451	0.179837	0.596	0.276152	0.8501	0.161688	0.934	0.417169	1.0541	0.22645	1.3435	0.265561	1.5059	0.186034
KYL-1	5751	0.197	0.063753	0.2631	0.0487498	0.2349	0.0784537	0.2969	0.199487	0.3376	0.213693	0.3967	0.0937159	0.6076	0.149881	0.5634	0.211322	0.6102	0.224563	0.9473	0.139793
LAC-3	94	0.2563	0.0627801	0.3714	0.0977641	0.2392	0.119546	0.2933	0.137753	0.4905	0.172552	0.5551	0.101526	0.7817	0.252471	0.7033	0.25006	0.7578	0.170471	0.7029	0.254389
LDV-58	149	0.1402	0.0548469	0.2977	0.0824015	0.2636	0.0754721	0.2703	0.299926	0.4335	0.112549	0.5582	0.247651	0.7227	0.195783	0.8282	0.110766	1.078	0.146391	1.1346	0.207558
LER-1	6932	0.2947	0.106354	0.4122	0.163726	0.597	0.134075	0.2096	0.113832	0.6986	0.217311	0.5748	0.14714	0.7458	0.196742	0.924	0.245558	0.6209	0.29628	0.6979	0.28663
LI-3	7224	0.2278	0.0494386	0.2888	0.0767938	0.5003	0.103048	0.385	0.299062	0.7706	0.231165	0.747	0.177783	1.0999	0.208921	1.1113	0.396555	1.302	0.489807	1.2198	0.388863
LI-7	7231	0.3059	0.0580966	0.3263	0.104965	0.2834	0.158649	0.1656	0.0763635	0.4962	0.205185	0.7212	0.133958	0.7055	0.126131	0.9105	0.265187	0.7222	0.192694	1.1099	0.678981
LO-2	7242	0.2535	0.0292242	0.3603	0.0755558	0.3555	0.0960605	0.2993	0.222264	0.5867	0.1	0.5386	0.129122	0.645	0.192744	0.6881	0.0744005	0.6117	0.19048	0.7337	0.207876
LOV-1	6043	0.2715	0.0443452	0.4742	0.0978477	0.341	0.160095	0.3756	0.275642	0.7821	0.220656	0.844	0.15412	0.995	0.111562	1.3126	0.184899	1.3923	0.300094	1.5493	0.289086
LOV-5	6046	0.2963	0.039727	0.3317	0.0464424	0.3871	0.132808	0.2236	0.0975411	0.6142	0.179436	0.7608	0.116443	0.8998	0.230019	0.8973	0.1346	0.9172	0.176645	1.0658	0.113988
LP2-2	7520	0.2797	0.0567862	0.4335	0.0838613	0.3337	0.0589841	0.3309	0.197744	0.4923	0.140342	0.5057	0.163416	0.7217	0.269399	0.4789	0.29528	0.7547	0.281032	0.6247	0.222042
LS-0	8312	0.1672	0.0490641	0.2166	0.0762834	0.1745	0.0946587	0.1374	0.10188	0.5044	0.149197	0.5919	0.123108	0.8564	0.111446	0.7829	0.211343	1.0288	0.176816	1.0749	0.167679
LU-1	8334	0.1684	0.0818647	0.244	0.110269	0.2883	0.14766	0.1819	0.141014	0.2232	0.09192	0.432	0.167741	0.3489	0.153544	0.3272	0.131083	0.4272	0.189962	0.3809	0.238082
MA-2	7246	0.1854	0.0698462	0.2259	0.110372	0.3148	0.099686	0.3272	0.152912	0.3901	0.14791	0.524	0.229804	0.774	0.311357	0.7979	0.26117	1.0316	0.334553	1.1537	0.312691
MH-0	7255	0.2548	0.0493486	0.3824	0.0781284	0.3817	0.148924	0.4974	0.221361	0.6914	0.154337	0.836	0.211338	0.9577	0.305711	0.7998	0.306009	0.8775	0.353333	1.178	0.167894
MIB-60	204	0.2349	0.0669501	0.3685	0.0695992	0.3749	0.125872	0.3397	0.114915	0.5451	0.0935491	0.6636	0.108093	0.7723	0.149206	0.8192	0.154908	0.925	0.193884	0.82	0.187844
MIB-86	224	0.3288	0.0831689	0.4899	0.114809	0.5734	0.174133	0.2753	0.188611	0.7088	0.14565	0.7873	0.187304	0.8396	0.198387	0.9456	0.137505	0.9105	0.166753	1.0787	0.163813
MIR-0	8337	0.219	0.0572014	0.3235	0.0826078	0.2507	0.125558	0.3832	0.154485	0.4429	0.205687	0.5231	0.102817	0.6522	0.168415	0.5232	0.210962	0.6956	0.20549	0.9348	0.227011
MNF-POT-48	1859	0.1774	0.10427	0.2478	0.161627	0.3578	0.14172	0.2392	0.232468	0.4326	0.132131	0.4137	0.147932	0.7246	0.157398	0.6427	0.215232	0.7739	0.205814	0.8503	0.277383
MNZ-0	7244	0.2336	0.0833749	0.467	0.0747752	0.5474	0.174696	0.3851	0.223103	0.6165	0.349618	0.9406	0.323554	0.8677	0.358093	1.1195	0.144125	1.3301	0.312464	1.181	0.613069
MOG-37	242	0.338	0.057577	0.3862	0.0705657	0.414	0.147625	0.2276	0.147242	0.4924	0.13236	0.631	0.17215	0.693	0.10824	1.0734	0.133562	1.0253	0.205407	1.2383	0.179494
MRK-0	6937	0.2422	0.0968295	0.2292	0.116501	0.5244	0.160124	0.5088	0.260574	0.5981	0.151027	0.5804	0.1267	0.8629	0.225831	1.1187	0.189408	1.1915	0.171837	1.3489	0.503782
MS-0	6938	0.2594	0.0689351	0.3354	0.0741098	0.2779	0.0608504	0.5385	0.315713	0.5666	0.150053	0.6054	0.170411	0.5399	0.181137	0.5297	0.240602	0.5251	0.217863	0.8518	0.275055
MT-0	6939	0.1719	0.0484251	0.2907	0.0585113	0.2634	0.05052	0.1975	0.219287	0.547	0.250472	0.6206	0.390179	0.735	0.461763	0.5522	0.176902	0.5565	0.202269	0.749	0.313032
NA-1	8343	0.1881	0.0897805	0.3737	0.0738031	0.4786	0.123859	0.3334	0.22372	0.4634	0.242809	0.7893	0.186068	0.6692	0.222154	0.7827	0.183511	1.0855	0.279946	1.0384	0.309432
ND-1	6942	0.3147	0.109163	0.4821	0.136771	0.467	0.137339	0.5662	0.240687	0.5073	0.098334	0.826	0.174343	0.7808	0.227077	0.9224	0.335556	0.832	0.295293	0.6815	0.245482
NO-0	7275	0.2078	0.0689924	0.3156	0.0840571	0.3758	0.0830526	0.47	0.134263	0.4546	0.186341	0.6246	0.221653	0.7111	0.338248	0.5423	0.249233	0.5582	0.266422	0.623	0.336396
NW-0	8348	0.2499	0.0776752	0.3371	0.0622476	0.4333	0.0648315	0.4292	0.177654	0.5067	0.125054	0.6971	0.109028	0.8115	0.161417	0.9028	0.1825	0.9559	0.15425	1.0515	0.175063
NW-4	7262	0.2584	0.0555202	0.3463	0.0494324	0.3445	0.131702	0.1507	0.10829	0.4784	0.184005	0.4216	0.158616	0.6379	0.177304	0.8327	0.158707	1.2781	0.22904	0.9966	0.419743
OB-0	7276	0.199	0.0738196	0.3173	0.0943505	0.6283	0.139144	0.2529	0.150723	0.6916	0.101045	0.6201	0.188988	0.8566	0.275514	0.774	0.249996	1.1237	0.36399	1.2605	0.337063
OLD-1	7280	0.2302	0.0559162	0.3167	0.0851366	0.4426	0.0710777	0.2993	0.154876	0.4785	0.165591	0.7257	0.08369	0.7507	0.148716	1.0501	0.191422	1.1882	0.202138	0.9479	0.20273
OR-0	7282	0.2332	0.0845981	0.3087	0.129008	0.3704	0.161156	0.979	0.182952	0.6729	0.114562	0.9152	0.219253	1.0326	0.195408	0.7041	0.357639	0.6887	0.287707	0.845	0.223401
OVE-0	7287	0.2783	0.0579522	0.4069	0.0797405	0.3775	0.094326	0.353	0.181927	0.5928	0.212562	0.7065	0.144751	0.7876	0.197751	0.7514	0.169742	0.8406	0.190741	1.0265	0.285541
PER-1	8354	0.2564	0.0391271	0.3041	0.0741507	0.4031	0.0594745	0.2609	0.144853	0.4821	0.166246	0.7564	0.134229	0.7715	0.069921	0.858	0.169846	0.8697	0.164963	0.9938	0.245811
PF-0	7297	0.2133	0.0702204	0.2862	0.0924275	0.3353	0.099655	0.3041	0.1627	0.5684	0.13641	0.5851	0.154442	0.5166	0.125904	0.4523	0.18101	0.6481	0.181244	0.3998	0.255392
PHW-2	8243	0.1466	0.0550842	0.3747	0.0720078	0.3362	0.138647	0.615	0.152034	0.6529	0.143302	0.6294	0.189569	0.7771	0.293337	1.1027	0.364674	0.832	0.196822	1.2536	0.131096
PLA-0	7300	0.3251	0.128209	0.3544	0.14869	0.4456	0.145773	0.4093	0.200719	0.5714	0.16737	0.5134	0.239068	0.5827	0.206443	0.5117	0.120298	0.5773	0.159213	0.584	0.192264
PN-0	7307	0.3066	0.0322842	0.4671	0.0467106	0.5306	0.114757	0.4596	0.242133	0.5276	0.249946	0.6916	0.165962	0.8891	0.208145	0.9161	0.138707	1.1535	0.19755	0.9335	0.161724
PO-1	7309	0.214	0.0513939	0.2848	0.117063	0.4396	0.227066	0.4837	0.227175	0.6267	0.0855142	0.6083	0.105182	0.7735	0.147031	0.8407	0.116882	0.9909	0.124565	0.9472	0.140506
POG-0	7306	0.3734	0.133995	0.5486	0.136285	0.5601	0.277983	0.3239	0.34125	0.9287	0.137558	0.8159	0.176493	1.2226	0.1395	1.1597	0.285328	1.171	0.275146	1.5008	0.261655
PRO-0	8213	0.2349	0.0551472	0.2325	0.0922933	0.4294	0.121956	0.2724	0.155801	0.4805	0.0720575	0.4447	0.129985	0.4362	0.18921	0.4504	0.0842077	0.4611	0.226005	0.5851	0.13069
PU2-7	6956	0.3041	0.0493974	0.3214	0.0438766	0.3176	0.113042	0.359	0.217957	0.5476	0.108334	0.7042	0.126307	0.7777	0.123266	0.9175	0.160459	0.9562	0.215763	1.2385	0.167209
RA-0	6958	0.4989	0.120084	0.6806	0.131423	0.6715	0.151856	0.3182	0.214268	0.801	0.243362	1.0595	0.220258	1.0576	0.204871	1.3588	0.371997	1.247	0.511555	1.3189	0.375309
RD-0	8366	0.1871	0.0474586	0.4811	0.0904943	0.5087	0.0838902	0.2259	0.136413	0.4639	0.0616179	0.7203	0.160881	0.7869	0.137437	0.8171	0.160334	0.8982	0.117045	1.0877	0.0851326
REN-1	6959	0.2393	0.0964734	0.257	0.0723971	0.3827	0.118105	0.4692	0.17882	0.512	0.0963985	0.6188	0.120517	0.8711	0.129622	0.9307	0.108369	0.9608	0.243337	1.0145	0.126768
ROU-0	7320	0.2763	0.0527153	0.4017	0.0422428	0.489	0.0803257	0.3044	0.14474	0.4605	0.146436	0.6658	0.118739	0.6481	0.152212	0.8696	0.163336	0.7409	0.309239	0.9107	0.185031
RRS-7	7514	0.223	0.10384	0.2682	0.124455	0.583	0.172991	0.48	0.36061	0.6269	0.17083	0.7016	0.164323	0.7367	0.220607	1.139	0.139345	1.0883	0.196683	1.3799	0.278761
RSCH-4	8374	0.2592	0.0506092	0.2456	0.0770443	0.379	0.124586	0.2393	0.179195	0.4091	0.0758192	0.5723	0.186122	0.7282	0.0943243	0.8812	0.128403	1.1307	0.235248	1.0759	0.282824
SAPPORO-0	7330	0.2395	0.036084	0.2556	0.0428595	0.3733	0.0902171	0.1421	0.100137	0.4894	0.165935	0.5924	0.0949529	0.7505	0.180018	0.7134	0.268494	0.6219	0.283467	0.9608	0.408727
SEATTLE-0	8245	0.2261	0.0446728	0.3997	0.0830248	0.3189	0.134643	0.1717	0.131805	0.5535	0.119228	0.5664	0.0829875	0.7703	0.161388	0.6997	0.199607	0.9661	0.201257	0.7966	0.117553
SG-1	7344	0.3043	0.0634526	0.3381	0.15244	0.696	0.217031	0.4742	0.198322	0.8182	0.2336	0.8052	0.111972	1.1032	0.15178	1.0577	0.209669	1.3714	0.131031	1.5378	0.21173
SH-0	7331	0.1783	0.0534105	0.2198	0.073433	0.1822	0.0638362	0.2271	0.148812	0.3994	0.188452	0.6504	0.167702	0.9715	0.315776	1.1185	0.39151	0.8044	0.439013	1.1379	0.350717
SHAHDARA	6962	0.4202	0.0648756	0.3098	0.14412	0.4452	0.116135	0.1879	0.164604	0.5718	0.156566	0.6326	0.121422	0.888	0.180578	1.014	0.299864	0.8899	0.235585	1.2187	0.074476
SI-0	7337	0.2133	0.0498777	0.3395	0.0420562	0.4245	0.0678008	0.2402	0.117155	0.6105	0.117565	0.6414	0.085258	0.8844	0.132147	0.8373	0.14598	0.9614	0.249013	0.9983	0.265498
SP-0	7343	0.2198	0.0653279	0.4391	0.0907138	0.3437	0.121444	0.3731	0.148609	0.517	0.160976	0.7168	0.147619	0.6899	0.205571	0.6942	0.226452	0.8218	0.209987	0.8268	0.257247
SQ-1	6966	0.244	0.0913905	0.3208	0.054715	0.2738	0.0847071	0.1969	0.206879	0.4966	0.120368	0.3759	0.118827	0.6076	0.226733	0.6812	0.216976	0.7991	0.127728	0.6954	0.0931703
ST-0	8387	0.1994	0.0642499	0.3189	0.0603977	0.4643	0.0899655	0.2739	0.136466	0.6988	0.105252	0.8007	0.0698762	1.0812	0.148276	1.114	0.203821	1.0276	0.230315	1.1962	0.2839
STE-3	2290	0.1722	0.0379409	0.4155	0.0509842	0.399	0.150587	0.2371	0.139441	0.5863	0.218046	0.4606	0.153768	0.715	0.167453	0.9589	0.20169	1.158	0.31096	1.0803	0.300707
STW-0	8388	0.2458	0.0938981	0.2149	0.099074	0.3569	0.0839609	0.3544	0.182347	0.5329	0.160767	0.5081	0.147255	0.7495	0.137	0.9179	0.101388	0.8187	0.0962728	0.9794	0.186788
TA-0	7349	0.2443	0.111077	0.3026	0.118745	0.313	0.115966	0.7588	0.265944	0.7284	0.173937	0.6607	0.131107	0.7337	0.361092	0.8514	0.48608	0.7902	0.351906	0.5714	0.19657
TE-0	7352	0.1126	0.0345324	0.2051	0.0414955	0.3036	0.12192	0.1921	0.0813217	0.3744	0.188574	0.4804	0.111399	0.6515	0.158817	0.5959	0.277971	0.7562	0.200858	0.9311	0.199341
TSCHA-1	7372	0.2831	0.0821333	0.3189	0.086698	0.5074	0.124546	0.3074	0.151937	0.6742	0.0924119	0.426	0.188007	0.7911	0.24364	0.6982	0.171723	0.7213	0.178864	0.7897	0.240645
TSU-1	6972	0.2821	0.0541837	0.5562	0.0974483	0.5108	0.20792	0.3097	0.194278	0.5658	0.164262	0.5226	0.149441	0.7521	0.367619	1.0219	0.235609	0.8065	0.418601	1.1689	0.322621
TU-1	7376	0.1907	0.0572384	0.3183	0.0854986	0.5017	0.139795	0.4143	0.268441	0.5095	0.105691	0.6041	0.0927164	0.6814	0.159562	0.6983	0.162706	0.7722	0.102908	1.0317	0.14302
UKNW06-059	5380	0.2333	0.0952576	0.3797	0.138601	0.3052	0.143547	0.2613	0.210484	0.534	0.144961	1.018	0.142387	0.8446	0.1637	1.1352	0.156211	1.1912	0.145065	1.1536	0.146704
ULL2-3	6973	0.2533	0.0469445	0.2988	0.111654	0.3889	0.0877768	0.3234	0.140942	0.5382	0.223188	0.6127	0.104192	0.6664	0.215074	0.7244	0.243494	0.5969	0.345532	0.8345	0.233666
WA-1	6978	0.2875	0.0460441	0.4026	0.108575	0.4518	0.107759	0.3587	0.122658	0.6867	0.167656	0.7312	0.111038	1.0017	0.167135	1.0208	0.188702	0.9913	0.183496	0.9462	0.30091
WC-1	7404	0.2153	0.0654303	0.3869	0.085813	0.3461	0.152522	0.263	0.151873	0.5095	0.112345	0.8398	0.160309	0.795	0.159538	1.1017	0.246421	0.913	0.349403	0.9428	0.246758
WEI-0	6979	0.3497	0.0844157	0.4416	0.121144	0.1266	0.11685	0.3205	0.264568	0.4409	0.151131	0.6438	0.116074	0.6629	0.1795	0.956	0.233146	0.8823	0.223599	1.1681	0.300564
WIL-1	100000	0.3047	0.108099	0.436	0.118383	0.4966	0.216127	0.3083	0.130866	0.4404	0.367566	1.323	0.518738	0.9734	0.196415	0.9667	0.178296	1.0719	0.35654	1.2248	0.29759
WS-2	6981	0.1557	0.0786653	0.309	0.0758434	0.3727	0.0683033	0.3148	0.169382	0.5522	0.126992	0.6388	0.145544	0.7062	0.171209	0.6922	0.290263	0.61	0.254021	0.9573	0.346487
ZDR-1	6984	0.1868	0.0536673	0.2551	0.107634	0.2993	0.0472112	0.4133	0.220851	0.4567	0.130502	0.4559	0.27249	0.7215	0.155077	0.4967	0.24855	0.8126	0.470557	0.6837	0.305535

## Sheet: Meristem
Table S2c Meristem length of accessions at 5 dps
Accession	ID	Mean_Meristem	SD
AMEL-1	6990	162.16	16.5717
AN-1	6898	174.993	23.5667
ANN-1	6994	150.61	16.9473
BA1-2	8256	158.965	9.59939
BA4-1	8258	227.394	28.452
BA5-1	8259	195.946	15.6796
BAA-1	7002	168.261	8.56887
BAY-0	6899	193.406	13.8948
BLA-1	7015	205.901	18.6408
BOOT-1	7026	164.359	8.81611
BS-1	8270	170.281	12.4982
BS-2	7004	157.978	23.6113
BSCH-2	7032	193.862	11.8407
BU-2	ND	192.312	25.682
BUR-0	5719	225.366	25.898
C24	6906	139.369	25.0421
CHAT-1	7071	190.854	15.4697
CHI-1	7073	175.363	17.8892
CIBC-5	6730	202.893	22.3861
COL-0	6909	210.23	26.1225
CRL-1	5731	260.517	34.305
CT-1	6910	198.999	19.2394
CVI-0	6911	163.832	10.0421
DI-1	7098	207.926	12.8547
DO-0	7102	182.07	21.7251
DRAII-1	8284	187.559	21.3823
EDI-0	7111	163.543	13.3584
EDI-8	9305	169.25	9.81699
EDINBURGH-5	9302	186.923	16.9496
EP-0	7123	178.599	21.5233
EST-1	6916	212.909	25.0287
GA-0	6919	158.578	28.3641
GD-1	8296	161.729	25.0505
GEL-1	7143	198.006	27.1128
GIE-0	7147	209.339	12.8197
GOT-7	6921	162.152	17.0746
GR-1	8300	188.779	15.9406
GU-0	6922	174.199	21.0162
HA-0	7163	154.791	21.14
HEY-1	7166	231.28	13.4421
HI-0	8304	155.282	23.5963
HIL-1	5745	150.158	19.7746
HS-0	8310	237.905	13.2947
HSM	8236	180.361	18.4568
IS-1	7176	176.371	18.1411
JM-0	8313	216.896	22.5151
JM-1	7178	179.932	21.4403
KA-0	8314	268.206	37.5659
KAS-2	8424	199.679	35.3444
KELSTERBACH-4	8420	206.995	24.5211
KIN-0	6926	219.637	20.6102
KONDARA	6929	153.941	16.4575
KR-0	7201	198.034	25.9018
KYL-1	5751	180.614	25.4455
LAC-3	94	145.048	17.5545
LDV-58	149	187.095	23.8776
LER-1	6932	193.454	16.6584
LI-3	7224	161.312	5.5041
LI-7	7231	247.74	33.5719
LO-2	7242	151.188	8.28174
LOV-1	6043	193.815	22.6468
LOV-5	6046	178.151	39.0724
LP2-2	7520	172.536	16.3493
LS-0	8312	149.246	15.7553
LU-1	8334	125.137	9.84805
MA-2	7246	179.851	30.4078
MH-0	7255	173.004	28.872
MIB-60	204	184.993	29.182
MIB-86	224	180.048	12.1083
MIR-0	8337	175.948	22.3292
MNF-POT-48	1859	197.941	20.2698
MNZ-0	7244	256.022	40.4162
MOG-37	242	168.954	20.3106
MRK-0	6937	187.668	18.5944
MS-0	6938	177.276	37.6571
MT-0	6939	156.51	23.4431
NA-1	8343	191.916	29.7552
ND-1	6942	215.818	21.8373
NO-0	7275	183.008	9.49414
NW-0	8348	159.995	21.4664
NW-4	7262	197.151	21.2615
OB-0	7276	182.834	11.2637
OLD-1	7280	209.035	16.6011
OR-0	7282	190.072	9.94801
OVE-0	7287	177.546	17.8901
PER-1	8354	185.009	13.0801
PF-0	7297	195.061	28.9469
PHW-2	8243	236.986	19.1074
PLA-0	7300	186.113	14.0565
PN-0	7307	210.562	33.7426
PO-1	7309	200.343	16.9274
POG-0	7306	200.022	25.0365
PRO-0	8213	202.04	13.6202
PU2-7	6956	193.384	17.7233
RA-0	6958	227.916	23.9585
RD-0	8366	212.03	27.6514
REN-1	6959	207.401	13.1309
ROU-0	7320	158.514	14.3298
RRS-7	7514	207.522	21.5707
RSCH-4	8374	173.671	22.9338
SAPPORO-0	7330	186.863	22.861
SEATTLE-0	8245	197.206	25.3779
SG-1	7344	215.351	14.4162
SH-0	7331	140.5	14.6336
SHAHDARA	6962	210.221	22.9986
SI-0	7337	158.024	9.65704
SP-0	7343	182.061	23.5991
SQ-1	6966	184.397	17.8747
ST-0	8387	224.766	18.1111
STE-3	2290	173.768	9.38397
STW-0	8388	198.86	19.8771
TA-0	7349	218.623	32.5312
TE-0	7352	158.241	23.2018
TSCHA-1	7372	202.505	21.279
TSU-1	6972	179.105	29.2536
TU-1	7376	196.012	27.2144
UKNW06-059	5380	221.631	23.4819
ULL2-3	6973	212.162	23.7851
WA-1	6978	232.513	20.4498
WC-1	7404	229.408	30.9814
WEI-0	6979	196.086	18.2044
WIL-1	100000	232.11	26.8679
WS-2	6981	175.051	16.9149
ZDR-1	6984	183.494	13.2619

## Sheet: EZ
Table S2c Elongation zone length of accessions at 5 dps
Accession	ID	Mean_EZ	SD
AMEL-1	6990	636.72	84.2887
AN-1	6898	472.407	37.5264
ANN-1	6994	500.04	53.8727
BA1-2	8256	484.362	68.2912
BA4-1	8258	631.473	67.4374
BA5-1	8259	723.706	77.7344
BAA-1	7002	446.609	25.6851
BAY-0	6899	430.535	33.5934
BLA-1	7015	827.467	88.9282
BOOT-1	7026	578.625	79.5245
BS-1	8270	449.768	59.2691
BS-2	7004	585.721	75.7807
BSCH-2	7032	492.456	46.8706
BU-2	ND	500.274	55.2865
BUR-0	5719	703.337	111.26
C24	6906	438.757	71.7149
CHAT-1	7071	462.695	51.7632
CHI-1	7073	693.673	28.1287
CIBC-5	6730	448.01	35.4148
COL-0	6909	575.746	96.4806
CRL-1	5731	507.59	56.6453
CT-1	6910	552.362	104.375
CVI-0	6911	488.623	63.691
DI-1	7098	393.162	42.3156
DO-0	7102	697.876	74.0987
DRAII-1	8284	564.24	48.4838
EDI-0	7111	581.197	67.7996
EDI-8	9305	503.02	45.851
EDINBURGH-5	9302	565.516	49.5261
EP-0	7123	674.319	97.8409
EST-1	6916	593.942	88.5918
GA-0	6919	523.177	119.648
GD-1	8296	371.048	93.7427
GEL-1	7143	528.161	33.2186
GIE-0	7147	435.853	40.3272
GOT-7	6921	498.832	52.4913
GR-1	8300	334.361	51.1456
GU-0	6922	424.036	67.4869
HA-0	7163	358.602	44.5368
HEY-1	7166	648.888	34.9953
HI-0	8304	352.72	88.7183
HIL-1	5745	486.8	43.9995
HS-0	8310	518.788	85.8232
HSM	8236	410.104	38.7365
IS-1	7176	478.859	104.385
JM-0	8313	670.202	67.5046
JM-1	7178	415.812	56.6951
KA-0	8314	523.959	36.5564
KAS-2	8424	415.999	82.047
KELSTERBACH-4	8420	619.528	79.459
KIN-0	6926	800.098	113.548
KONDARA	6929	378.215	24.1357
KR-0	7201	516.16	101.397
KYL-1	5751	359.349	41.1821
LAC-3	94	493.604	79.9314
LDV-58	149	447.895	57.3733
LER-1	6932	434.624	55.5555
LI-3	7224	544.879	93.1634
LI-7	7231	600.504	92.7901
LO-2	7242	427.163	41.7841
LOV-1	6043	804.15	80.6611
LOV-5	6046	639.457	86.0551
LP2-2	7520	486.517	53.5468
LS-0	8312	421.79	47.1691
LU-1	8334	385.163	93.895
MA-2	7246	510.312	84.6893
MH-0	7255	519.181	73.2153
MIB-60	204	575.392	70.3865
MIB-86	224	450.889	120.672
MIR-0	8337	402.859	60.4889
MNF-POT-48	1859	498.411	38.4709
MNZ-0	7244	538.582	83.2744
MOG-37	242	456.861	42.6948
MRK-0	6937	644.479	62.4241
MS-0	6938	336.424	55.9896
MT-0	6939	454.81	78.0898
NA-1	8343	455.46	71.9977
ND-1	6942	521.468	83.1975
NO-0	7275	329.995	35.419
NW-0	8348	446.945	41.7893
NW-4	7262	685.375	72.1498
OB-0	7276	484.314	77.53
OLD-1	7280	535.706	48.7544
OR-0	7282	541.175	50.0996
OVE-0	7287	531.324	70.5976
PER-1	8354	498.025	88.1686
PF-0	7297	373.201	82.9696
PHW-2	8243	567.511	39.7056
PLA-0	7300	472.772	123.558
PN-0	7307	565.99	76.2018
PO-1	7309	599.853	42.1711
POG-0	7306	602.907	56.9931
PRO-0	8213	451.377	52.9192
PU2-7	6956	411.524	54.7028
RA-0	6958	615.178	39.7243
RD-0	8366	557.62	84.9399
REN-1	6959	581.312	128.43
ROU-0	7320	521.687	65.1463
RRS-7	7514	682.062	74.6089
RSCH-4	8374	490.057	61.7046
SAPPORO-0	7330	430.71	27.5623
SEATTLE-0	8245	649.423	84.3708
SG-1	7344	511.322	72.14
SH-0	7331	335.014	65.6908
SHAHDARA	6962	686.114	62.9955
SI-0	7337	448.23	54.5211
SP-0	7343	593.256	56.3594
SQ-1	6966	488.507	76.6094
ST-0	8387	514.968	66.6816
STE-3	2290	363.296	39.1204
STW-0	8388	356.425	30.2701
TA-0	7349	583.614	57.7282
TE-0	7352	576.103	94.7967
TSCHA-1	7372	547.101	62.8798
TSU-1	6972	442.389	58.3529
TU-1	7376	440.054	54.5181
UKNW06-059	5380	406.773	26.1357
ULL2-3	6973	508.296	78.256
WA-1	6978	541.342	22.3737
WC-1	7404	535.472	60.0611
WEI-0	6979	667.594	93.0788
WIL-1	100000	619.836	88.8956
WS-2	6981	513.883	66.7805
ZDR-1	6984	475.658	27.9012
