# Supplementary material for: Combined Approach of GWAS and Phylogenetic Analyses to Identify New Candidate Genes That Participate in Arabidopsis thaliana Primary Root Development Using Cellular Measurements and Primary Root Length
Source: Plants (Basel). 2022 Nov 18;11(22):3162. doi: 10.3390/plants11223162 (PMC9697774; doi:10.3390/plants11223162)
Supplement: Supplementary file 1 [file plants-11-03162-s001.zip › Table S3. Classification of traits in short, medium and large..xlsx]

## Sheet: PR_length_12dps
Table S3a. Primary root length classification of accessions in small, medium and large
Accession	ID	Small_root	SD	Medium_root	SD	Large_root	SD
AMEL-1	6990	3.669	0.205037
AN-1	6898					8.3307	0.380651
ANN-1	6994			6.0974	0.361276
BA1-2	8256	4.3557	0.270853
BA4-1	8258			6.8214	0.374372
BA5-1	8259			7.1818	0.530095
BAA-1	7002	4.7651	0.281036
BAY-0	6899	4.8448	0.555003
BLA-1	7015			6.6534	0.38683
BOOT-1	7026			6.6092	0.373887
BS-1	8270			6.8874	0.303144
BS-2	7004					8.511	0.556581
BSCH-2	7032	5.0522	0.384233
BU-2	ND			6.9054	0.365228
BUR-0	5719					7.9402	0.784248
C24	6906	4.7821	0.475431
CHAT-1	7071	4.6389	0.448735
CHI-1	7073			5.5549	0.377815
CIBC-5	6730			5.4294	0.424216
COL-0	6909			7.2548	0.508451
CRL-1	5731					9.1902	0.639636
CT-1	6910			6.0892	0.516661
CVI-0	6911			5.3506	0.600172
DI-1	7098	4.6189	0.157117
DO-0	7102			5.6617	0.231121
DRAII-1	8284			5.9485	0.347597
EDI-0	7111			5.5875	0.41564
EDI-8	9305			6.3768	0.654787
EDINBURGH-5	9302			5.6841	0.267652
EP-0	7123			6.5473	0.343897
EST-1	6916			6.468	0.740671
GA-0	6919			5.4364	0.683299
GD-1	8296	3.141	0.440607
GEL-1	7143			6.7967	0.451919
GIE-0	7147	4.5401	0.356184
GOT-7	6921			5.8368	0.41564
GR-1	8300			6.9446	0.57806
GU-0	6922			6.2231	0.454188
HA-0	7163			6.0801	0.632322
HEY-1	7166			7.2025	0.59166
HI-0	8304	4.665	0.634104
HIL-1	5745			5.4324	0.553687
HS-0	8310					8.3742	0.601201
HSM	8236			6.9933	0.46831
IS-1	7176			5.3486	0.898373
JM-0	8313					7.7659	0.800112
JM-1	7178			5.3015	0.753769
KA-0	8314					9.4433	0.317888
KAS-2	8424			5.5638	0.348218
KELSTERBACH-4	8420					8.1463	0.629477
KIN-0	6926			6.2811	0.309162
KONDARA	6929			7.0233	0.338112
KR-0	7201					7.4827	0.812905
KYL-1	5751	4.6905	0.48568
LAC-3	94			5.3787	0.511718
LDV-58	149			5.8207	0.349487
LER-1	6932			6.0147	0.626511
LI-3	7224					7.8802	0.765469
LI-7	7231			5.9725	0.899838
LO-2	7242	5.2254	0.565262
LOV-1	6043					8.5082	0.577444
LOV-5	6046			6.5487	0.334558
LP2-2	7520	5.1537	0.593614
LS-0	8312			5.7062	0.647927
LU-1	8334	3.1594	0.608196
MA-2	7246			5.8911	0.612551
MH-0	7255			7.0815	0.532074
MIB-60	204			6.0281	0.28111
MIB-86	224			7.1624	0.360263
MIR-0	8337	5.1213	0.423217
MNF-POT-48	1859	5.0445	0.55557
MNZ-0	7244					7.9577	0.799526
MOG-37	242			6.7352	0.27401
MRK-0	6937					7.4121	0.723293
MS-0	6938	5.1972	0.475913
MT-0	6939	4.8498	0.669904
NA-1	8343			6.4059	0.95222
ND-1	6942			6.6184	0.8068
NO-0	7275	5.0549	0.553146
NW-0	8348			6.5761	0.467836
NW-4	7262			5.9279	0.904497
OB-0	7276			6.912	1.07823
OLD-1	7280			6.5551	0.215517
OR-0	7282			6.9545	0.888921
OVE-0	7287			6.3154	0.545882
PER-1	8354			6.1876	0.548317
PF-0	7297	4.5221	0.498907
PHW-2	8243			6.8411	0.416376
PLA-0	7300	5.0814	0.272504
PN-0	7307			7.0395	0.523975
PO-1	7309			6.3793	0.414438
POG-0	7306					9.1245	0.660742
PRO-0	8213	4.252	0.584231
PU2-7	6956			6.6448	0.446162
RA-0	6958					9.5157	0.928288
RD-0	8366			6.2926	0.314687
REN-1	6959			6.5017	0.437273
ROU-0	7320			5.9485	0.522838
RRS-7	7514					7.435	0.585173
RSCH-4	8374			6.1095	0.482208
SAPPORO-0	7330	5.2543	0.670791
SEATTLE-0	8245			5.6582	0.295346
SG-1	7344					8.7245	0.360098
SH-0	7331			6.0802	0.43984
SHAHDARA	6962			6.7893	0.284817
SI-0	7337			6.2974	0.305147
SP-0	7343			5.7875	0.561916
SQ-1	6966	4.8483	0.23789
ST-0	8387			7.3141	0.464829
STE-3	2290			6.3098	0.505151
STW-0	8388			5.8803	0.391379
TA-0	7349			6.1235	0.952207
TE-0	7352	4.6526	0.50337
TSCHA-1	7372			5.7756	0.84257
TSU-1	6972			6.7051	0.876703
TU-1	7376			5.8569	0.386957
UKNW06-059	5380			7.3016	0.177158
ULL2-3	6973			5.4317	0.713402
WA-1	6978			7.0468	0.460626
WC-1	7404			6.551	0.364851
WEI-0	6979			6.2723	0.442772
WIL-1	100000					7.781	0.504085
WS-2	6981			5.5324	0.746932
ZDR-1	6984	4.9039	0.646948

## Sheet: Growth_rate_12dps
Table S3b. Growth rate classification of accessions in slow, medium and fast
Accession	ID	Slow_Growth_rate	SD	Medium_Growth_rate	SD	Fast_Growth_rate	SD	PR length		PR growth
AMEL-1	6990	0.3242	0.214129						0.46875	Medianas
AN-1	6898					1.3865	0.279134	Large	0.53125	Largas
ANN-1	6994			1.0909	0.51057
BA1-2	8256	0.4234	0.106726
BA4-1	8258			1.1375	0.459934
BA5-1	8259					1.221	0.179056	Medium
BAA-1	7002			0.7245	0.338758
BAY-0	6899	0.6264	0.136017
BLA-1	7015			0.8189	0.320184
BOOT-1	7026			1.0169	0.144159
BS-1	8270					1.3756	0.357034	Medium
BS-2	7004					1.2847	0.193172	Large
BSCH-2	7032			0.753	0.288425
BU-2	ND					1.465	0.154929	Medium
BUR-0	5719					1.2725	0.969243	Large
C24	6906			0.9428	0.158644
CHAT-1	7071	0.5376	0.276942
CHI-1	7073			0.8934	0.11739
CIBC-5	6730			0.7866	0.217862
COL-0	6909			0.9882	0.174514
CRL-1	5731					1.4771	0.383462	Large
CT-1	6910			0.8919	0.256743
CVI-0	6911			0.9425	0.275837
DI-1	7098	0.5678	0.315027
DO-0	7102			0.8285	0.121629
DRAII-1	8284			0.9216	0.293571
EDI-0	7111			1.0034	0.232032
EDI-8	9305			1.0762	0.540522
EDINBURGH-5	9302			0.9242	0.0927036
EP-0	7123					1.1736	0.333759	Medium
EST-1	6916			0.9908	0.157737
GA-0	6919			0.9975	0.235601
GD-1	8296	0.2759	0.166246
GEL-1	7143			1.1169	0.356971
GIE-0	7147	0.5468	0.111604
GOT-7	6921			0.9914	0.282961
GR-1	8300			1.0822	0.6596
GU-0	6922			1.0229	0.34733
HA-0	7163			0.8004	0.343933
HEY-1	7166			1.1426	0.35189
HI-0	8304			0.739	0.138739
HIL-1	5745			0.8497	0.581713
HS-0	8310					1.5353	0.123173	Large
HSM	8236			0.9007	0.382265
IS-1	7176	0.6015	0.330461
JM-0	8313			1.051	0.255413
JM-1	7178			0.8092	0.4338
KA-0	8314					1.5797	0.592907	Large
KAS-2	8424			0.8491	0.178031
KELSTERBACH-4	8420					1.477	0.245721	Large
KIN-0	6926			0.9792	0.172593
KONDARA	6929			1.021	0.247597
KR-0	7201					1.5059	0.186034	Large
KYL-1	5751			0.9473	0.139793
LAC-3	94	0.7029	0.254389
LDV-58	149			1.1346	0.207558
LER-1	6932	0.6979	0.28663
LI-3	7224					1.2198	0.388863	Large
LI-7	7231			1.1099	0.678981
LO-2	7242			0.7337	0.207876
LOV-1	6043					1.5493	0.289086	Large
LOV-5	6046			1.0658	0.113988
LP2-2	7520	0.6247	0.222042
LS-0	8312			1.0749	0.167679
LU-1	8334	0.3809	0.238082
MA-2	7246					1.1537	0.312691	Medium
MH-0	7255					1.178	0.167894	Medium
MIB-60	204			0.82	0.187844
MIB-86	224			1.0787	0.163813
MIR-0	8337			0.9348	0.227011
MNF-POT-48	1859			0.8503	0.277383
MNZ-0	7244					1.181	0.613069	Large
MOG-37	242					1.2383	0.179494	Medium
MRK-0	6937					1.3489	0.503782	Large
MS-0	6938			0.8518	0.275055
MT-0	6939			0.749	0.313032
NA-1	8343			1.0384	0.309432
ND-1	6942	0.6815	0.245482
NO-0	7275	0.623	0.336396
NW-0	8348			1.0515	0.175063
NW-4	7262			0.9966	0.419743
OB-0	7276					1.2605	0.337063
OLD-1	7280			0.9479	0.20273			Medium
OR-0	7282			0.845	0.223401
OVE-0	7287			1.0265	0.285541
PER-1	8354			0.9938	0.245811
PF-0	7297	0.3998	0.255392
PHW-2	8243					1.2536	0.131096	Medium
PLA-0	7300	0.584	0.192264
PN-0	7307			0.9335	0.161724
PO-1	7309			0.9472	0.140506
POG-0	7306					1.5008	0.261655	Large
PRO-0	8213	0.5851	0.13069
PU2-7	6956					1.2385	0.167209	Medium
RA-0	6958					1.3189	0.375309	Large
RD-0	8366			1.0877	0.0851326
REN-1	6959			1.0145	0.126768
ROU-0	7320			0.9107	0.185031
RRS-7	7514					1.3799	0.278761	Large
RSCH-4	8374			1.0759	0.282824
SAPPORO-0	7330			0.9608	0.408727
SEATTLE-0	8245			0.7966	0.117553
SG-1	7344					1.5378	0.21173	Large
SH-0	7331			1.1379	0.350717
SHAHDARA	6962					1.2187	0.074476	Medium
SI-0	7337			0.9983	0.265498
SP-0	7343			0.8268	0.257247
SQ-1	6966	0.6954	0.0931703
ST-0	8387					1.1962	0.2839	Medium
STE-3	2290			1.0803	0.300707
STW-0	8388			0.9794	0.186788
TA-0	7349	0.5714	0.19657
TE-0	7352			0.9311	0.199341
TSCHA-1	7372			0.7897	0.240645
TSU-1	6972					1.1689	0.322621	Medium
TU-1	7376			1.0317	0.14302
UKNW06-059	5380					1.1536	0.146704	Medium
ULL2-3	6973			0.8345	0.233666
WA-1	6978			0.9462	0.30091
WC-1	7404			0.9428	0.246758
WEI-0	6979					1.1681	0.300564	Medium
WIL-1	100000					1.2248	0.29759	Large
WS-2	6981			0.9573	0.346487
ZDR-1	6984	0.6837	0.305535

## Sheet: Meristem_length
Table S3b. Meristem length classification of accessions in slow, medium and fast
Accession	ID	Small_meristem	SD	Medium_meristem	SD	Large_meristem	SD
AMEL-1	6990	162.16	16.5717
AN-1	6898			174.993	23.5667
ANN-1	6994	150.61	16.9473
BA1-2	8256	158.965	9.59939
BA4-1	8258					227.394	28.452
BA5-1	8259			195.946	15.6796
BAA-1	7002	168.261	8.56887
BAY-0	6899			193.406	13.8948
BLA-1	7015			205.901	18.6408
BOOT-1	7026	164.359	8.81611
BS-1	8270	170.281	12.4982
BS-2	7004	157.978	23.6113
BSCH-2	7032			193.862	11.8407
BU-2	ND			192.312	25.682
BUR-0	5719					225.366	25.898
C24	6906	139.369	25.0421
CHAT-1	7071			190.854	15.4697
CHI-1	7073			175.363	17.8892
CIBC-5	6730			202.893	22.3861
COL-0	6909			210.23	26.1225
CRL-1	5731					260.517	34.305
CT-1	6910			198.999	19.2394
CVI-0	6911	163.832	10.0421
DI-1	7098			207.926	12.8547
DO-0	7102			182.07	21.7251
DRAII-1	8284			187.559	21.3823
EDI-0	7111	163.543	13.3584
EDI-8	9305	169.25	9.81699
EDINBURGH-5	9302			186.923	16.9496
EP-0	7123			178.599	21.5233
EST-1	6916			212.909	25.0287
GA-0	6919	158.578	28.3641
GD-1	8296	161.729	25.0505
GEL-1	7143			198.006	27.1128
GIE-0	7147			209.339	12.8197
GOT-7	6921	162.152	17.0746
GR-1	8300			188.779	15.9406
GU-0	6922			174.199	21.0162
HA-0	7163	154.791	21.14
HEY-1	7166					231.28	13.4421
HI-0	8304	155.282	23.5963
HIL-1	5745	150.158	19.7746
HS-0	8310					237.905	13.2947
HSM	8236			180.361	18.4568
IS-1	7176			176.371	18.1411
JM-0	8313			216.896	22.5151
JM-1	7178			179.932	21.4403
KA-0	8314					268.206	37.5659
KAS-2	8424			199.679	35.3444
KELSTERBACH-4	8420			206.995	24.5211
KIN-0	6926			219.637	20.6102
KONDARA	6929	153.941	16.4575
KR-0	7201			198.034	25.9018
KYL-1	5751			180.614	25.4455
LAC-3	94	145.048	17.5545
LDV-58	149			187.095	23.8776
LER-1	6932			193.454	16.6584
LI-3	7224	161.312	5.5041
LI-7	7231					247.74	33.5719
LO-2	7242	151.188	8.28174
LOV-1	6043			193.815	22.6468
LOV-5	6046			178.151	39.0724
LP2-2	7520	172.536	16.3493
LS-0	8312	149.246	15.7553
LU-1	8334	125.137	9.84805
MA-2	7246			179.851	30.4078
MH-0	7255			173.004	28.872
MIB-60	204			184.993	29.182
MIB-86	224			180.048	12.1083
MIR-0	8337			175.948	22.3292
MNF-POT-48	1859			197.941	20.2698
MNZ-0	7244					256.022	40.4162
MOG-37	242	168.954	20.3106
MRK-0	6937			187.668	18.5944
MS-0	6938			177.276	37.6571
MT-0	6939	156.51	23.4431
NA-1	8343			191.916	29.7552
ND-1	6942			215.818	21.8373
NO-0	7275			183.008	9.49414
NW-0	8348	159.995	21.4664
NW-4	7262			197.151	21.2615
OB-0	7276			182.834	11.2637
OLD-1	7280			209.035	16.6011
OR-0	7282			190.072	9.94801
OVE-0	7287			177.546	17.8901
PER-1	8354			185.009	13.0801
PF-0	7297			195.061	28.9469
PHW-2	8243					236.986	19.1074
PLA-0	7300			186.113	14.0565
PN-0	7307			210.562	33.7426
PO-1	7309			200.343	16.9274
POG-0	7306			200.022	25.0365
PRO-0	8213			202.04	13.6202
PU2-7	6956			193.384	17.7233
RA-0	6958					227.916	23.9585
RD-0	8366			212.03	27.6514
REN-1	6959			207.401	13.1309
ROU-0	7320	158.514	14.3298
RRS-7	7514			207.522	21.5707
RSCH-4	8374			173.671	22.9338
SAPPORO-0	7330			186.863	22.861
SEATTLE-0	8245			197.206	25.3779
SG-1	7344			215.351	14.4162
SH-0	7331	140.5	14.6336
SHAHDARA	6962			210.221	22.9986
SI-0	7337	158.024	9.65704
SP-0	7343			182.061	23.5991
SQ-1	6966			184.397	17.8747
ST-0	8387					224.766	18.1111
STE-3	2290			173.768	9.38397
STW-0	8388			198.86	19.8771
TA-0	7349			218.623	32.5312
TE-0	7352	158.241	23.2018
TSCHA-1	7372			202.505	21.279
TSU-1	6972			179.105	29.2536
TU-1	7376			196.012	27.2144
UKNW06-059	5380					221.631	23.4819
ULL2-3	6973			212.162	23.7851
WA-1	6978					232.513	20.4498
WC-1	7404					229.408	30.9814
WEI-0	6979			196.086	18.2044
WIL-1	100000					232.11	26.8679
WS-2	6981			175.051	16.9149
ZDR-1	6984			183.494	13.2619

## Sheet: EZ_length
Accession	ID	Small_EZ	SD	Medium_EZ	SD	Large_EZ	SD	PR growth
AMEL-1	6990			636.72	84.2887			0.692308	Medianas
AN-1	6898	472.407	37.5264					0.307692	Largas
ANN-1	6994			500.04	53.8727
BA1-2	8256	484.362	68.2912
BA4-1	8258			631.473	67.4374
BA5-1	8259					723.706	77.7344	Medium
BAA-1	7002	446.609	25.6851
BAY-0	6899	430.535	33.5934
BLA-1	7015					827.467	88.9282	Medium
BOOT-1	7026			578.625	79.5245
BS-1	8270	449.768	59.2691
BS-2	7004			585.721	75.7807
BSCH-2	7032	492.456	46.8706
BU-2	ND			500.274	55.2865
BUR-0	5719					703.337	111.26	Large
C24	6906	438.757	71.7149
CHAT-1	7071	462.695	51.7632
CHI-1	7073					693.673	28.1287	Medium
CIBC-5	6730	448.01	35.4148
COL-0	6909			575.746	96.4806
CRL-1	5731			507.59	56.6453
CT-1	6910			552.362	104.375
CVI-0	6911	488.623	63.691
DI-1	7098	393.162	42.3156
DO-0	7102					697.876	74.0987	Medium
DRAII-1	8284			564.24	48.4838
EDI-0	7111			581.197	67.7996
EDI-8	9305			503.02	45.851
EDINBURGH-5	9302			565.516	49.5261
EP-0	7123					674.319	97.8409	Medium
EST-1	6916			593.942	88.5918
GA-0	6919			523.177	119.648
GD-1	8296	371.048	93.7427
GEL-1	7143			528.161	33.2186
GIE-0	7147	435.853	40.3272
GOT-7	6921			498.832	52.4913
GR-1	8300	334.361	51.1456
GU-0	6922	424.036	67.4869
HA-0	7163	358.602	44.5368
HEY-1	7166			648.888	34.9953
HI-0	8304	352.72	88.7183
HIL-1	5745	486.8	43.9995
HS-0	8310			518.788	85.8232
HSM	8236	410.104	38.7365
IS-1	7176	478.859	104.385
JM-0	8313					670.202	67.5046	Large
JM-1	7178	415.812	56.6951
KA-0	8314			523.959	36.5564
KAS-2	8424	415.999	82.047
KELSTERBACH-4	8420			619.528	79.459
KIN-0	6926					800.098	113.548	Medium
KONDARA	6929	378.215	24.1357
KR-0	7201			516.16	101.397
KYL-1	5751	359.349	41.1821
LAC-3	94	493.604	79.9314
LDV-58	149	447.895	57.3733
LER-1	6932	434.624	55.5555
LI-3	7224			544.879	93.1634
LI-7	7231			600.504	92.7901
LO-2	7242	427.163	41.7841
LOV-1	6043					804.15	80.6611	Large
LOV-5	6046			639.457	86.0551
LP2-2	7520	486.517	53.5468
LS-0	8312	421.79	47.1691
LU-1	8334	385.163	93.895
MA-2	7246			510.312	84.6893
MH-0	7255			519.181	73.2153
MIB-60	204			575.392	70.3865
MIB-86	224	450.889	120.672
MIR-0	8337	402.859	60.4889
MNF-POT-48	1859			498.411	38.4709
MNZ-0	7244			538.582	83.2744
MOG-37	242	456.861	42.6948
MRK-0	6937			644.479	62.4241
MS-0	6938	336.424	55.9896
MT-0	6939	454.81	78.0898
NA-1	8343	455.46	71.9977
ND-1	6942			521.468	83.1975
NO-0	7275	329.995	35.419
NW-0	8348	446.945	41.7893
NW-4	7262					685.375	72.1498	Medium
OB-0	7276	484.314	77.53
OLD-1	7280			535.706	48.7544
OR-0	7282			541.175	50.0996
OVE-0	7287			531.324	70.5976
PER-1	8354			498.025	88.1686
PF-0	7297	373.201	82.9696
PHW-2	8243			567.511	39.7056
PLA-0	7300	472.772	123.558
PN-0	7307			565.99	76.2018
PO-1	7309			599.853	42.1711
POG-0	7306			602.907	56.9931
PRO-0	8213	451.377	52.9192
PU2-7	6956	411.524	54.7028
RA-0	6958			615.178	39.7243
RD-0	8366			557.62	84.9399
REN-1	6959			581.312	128.43
ROU-0	7320			521.687	65.1463
RRS-7	7514					682.062	74.6089	Large
RSCH-4	8374	490.057	61.7046
SAPPORO-0	7330	430.71	27.5623
SEATTLE-0	8245			649.423	84.3708
SG-1	7344			511.322	72.14
SH-0	7331	335.014	65.6908
SHAHDARA	6962					686.114	62.9955	Medium
SI-0	7337	448.23	54.5211
SP-0	7343			593.256	56.3594
SQ-1	6966	488.507	76.6094
ST-0	8387			514.968	66.6816
STE-3	2290	363.296	39.1204
STW-0	8388	356.425	30.2701
TA-0	7349			583.614	57.7282
TE-0	7352			576.103	94.7967
TSCHA-1	7372			547.101	62.8798
TSU-1	6972	442.389	58.3529
TU-1	7376	440.054	54.5181
UKNW06-059	5380	406.773	26.1357
ULL2-3	6973			508.296	78.256
WA-1	6978			541.342	22.3737
WC-1	7404			535.472	60.0611
WEI-0	6979					667.594	93.0788	Medium
WIL-1	100000			619.836	88.8956
WS-2	6981			513.883	66.7805
ZDR-1	6984	475.658	27.9012
